# Supplementary material for: Carvacrol Microemulsion vs. Nanoemulsion as Novel Pork Minced Meat Active Coatings
Source: MDPI journal article supplement (doi:10.3390/nano13243161), 2023-12-18
Supplement: s1 [file s1]

# Carvacrol Microemulsion vs. Nanoemulsion as Novel Pork Minced Meat Active Coatings

Konstantinos Zaharioudakis <sup>1</sup>, Eleni Kollia <sup>2</sup>, Areti Leontiou <sup>1</sup>, Dimitrios Moschovas <sup>3</sup>, Andreas Karydis-Messinis <sup>3</sup>, Apostolos Avgeropoulos <sup>3</sup>, Nikolaos E. Zafeiropoulos <sup>3</sup>, Efthymia Ragkava <sup>1</sup>, George Kehayias <sup>1</sup>, Charalampos Proestos <sup>2</sup>, Constantinos E. Salmas <sup>3,\*</sup> and Aris E. Giannakas <sup>1,\*</sup>

<sup>1</sup> Department of Food Science and Technology, University of Patras, 30100 Agrinio, Greece; zacharioudakis.k@upatras.gr (K.Z.); aleontiu@upatras.gr (A.L.); effierag@yahoo.com (E.R.); gkechagi@upatras.gr (G.K.)

<sup>2</sup> Laboratory of Food Chemistry, Department of Chemistry, National and Kapodistrian University of Athens Zografou, 15771 Athens, Greece; elenikollia@chem.uoa.gr (E.K.); harpro@chem.uoa.gr (C.P.)

<sup>3</sup> Department of Material Science and Engineering, University of Ioannina, 45110 Ioannina, Greece; dmoschov@uoi.gr (D.M.); a.karyd@uoi.gr (A.K.-M.); aavger@uoi.gr (A.A.); nzafirop@uoi.gr (N.E.Z.)

\* Correspondence: ksalmas@uoi.gr (C.E.S.); agiannakas@upatras.gr (A.E.G.)

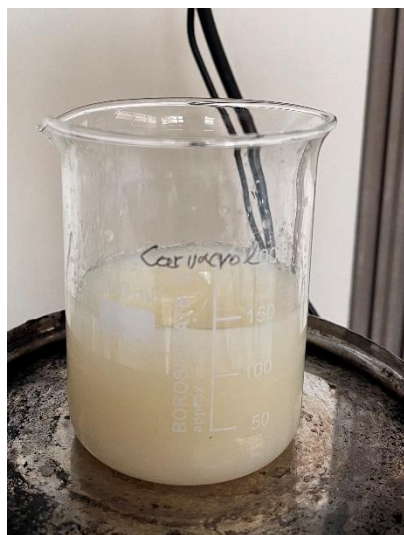

**Figure S1.** Preparation of carvacrol nanoemulsion (NC)

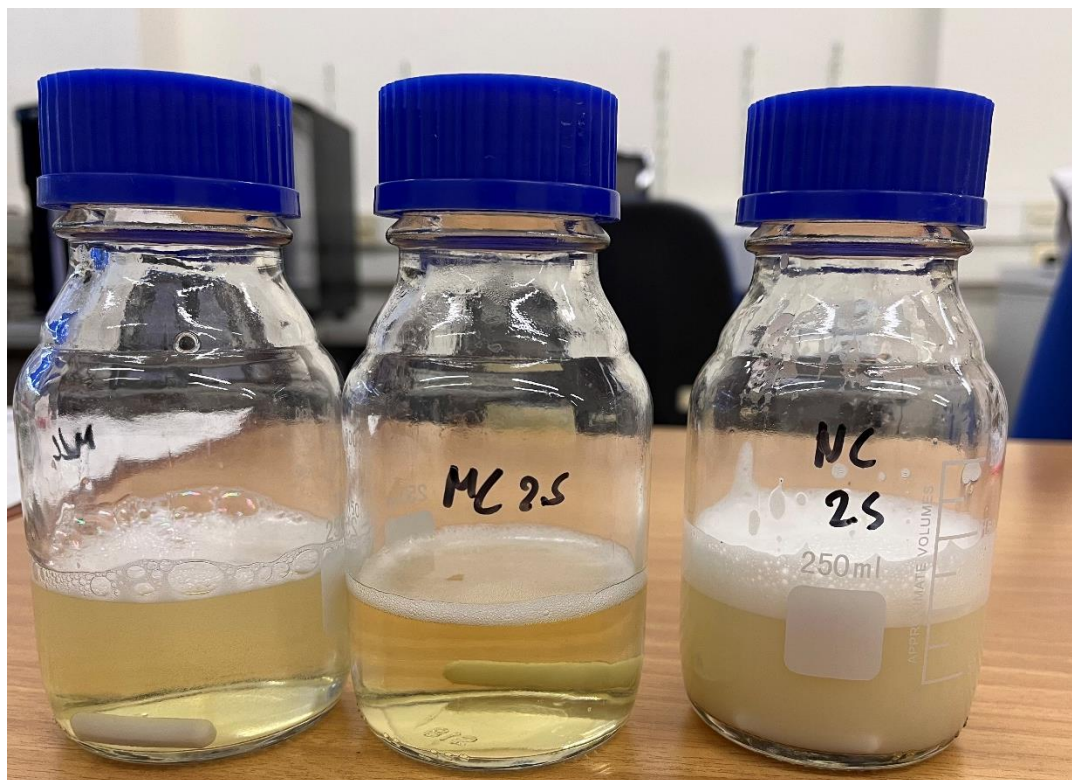

**Figure S2.** Image with Carvacrol microemulsion (MC)(left), carvacrol microemulsion with chitosan (MC)(middle) and carvacrol nanoemulsion (NC)(right) prepared in this study.

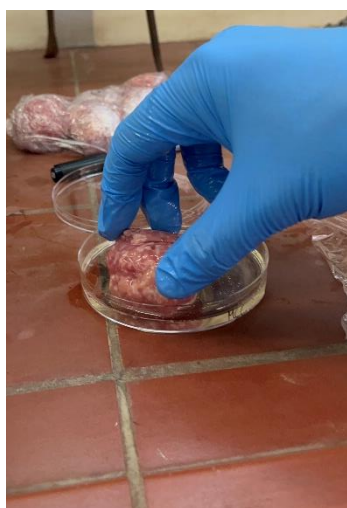

**Figure S3.** Minced meat coating process

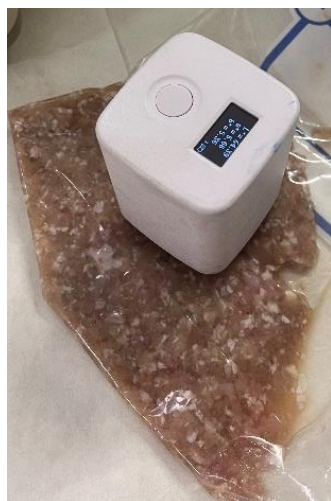

**Figure S4.** Representative image with L\*a\*b measurement in minced pork meat samples

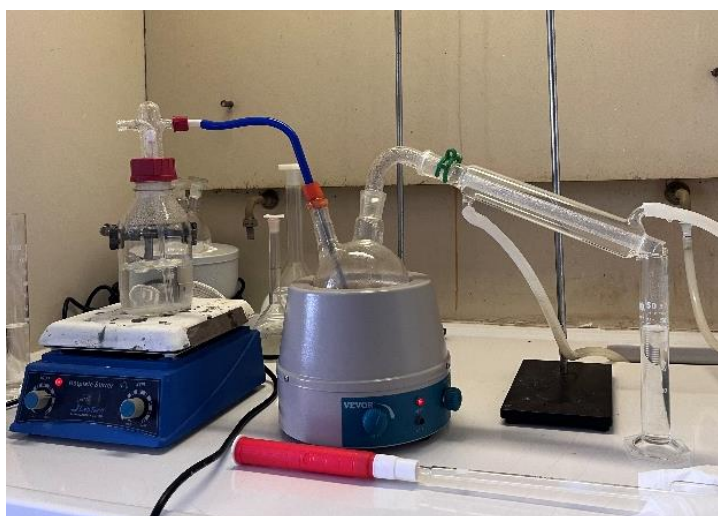

**Figure S5.** Steam distillation apparatus employed for the calculation of TBARs in meat samples.

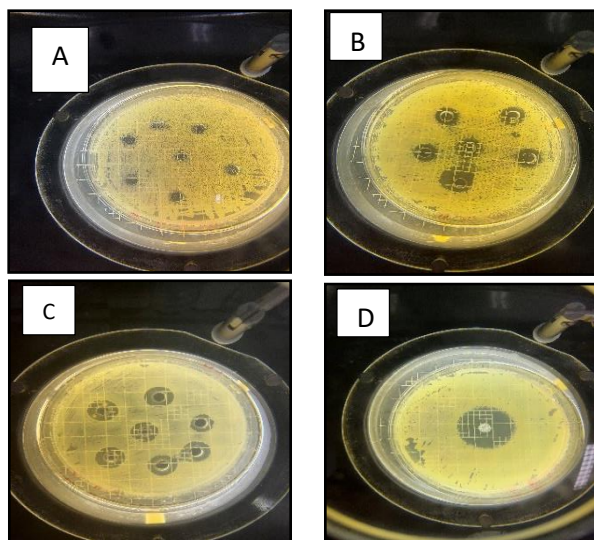

**Figure S6.** Representative images of obtained diffusion zone: A) FC, B) MC, C) MCC and D) NC samples

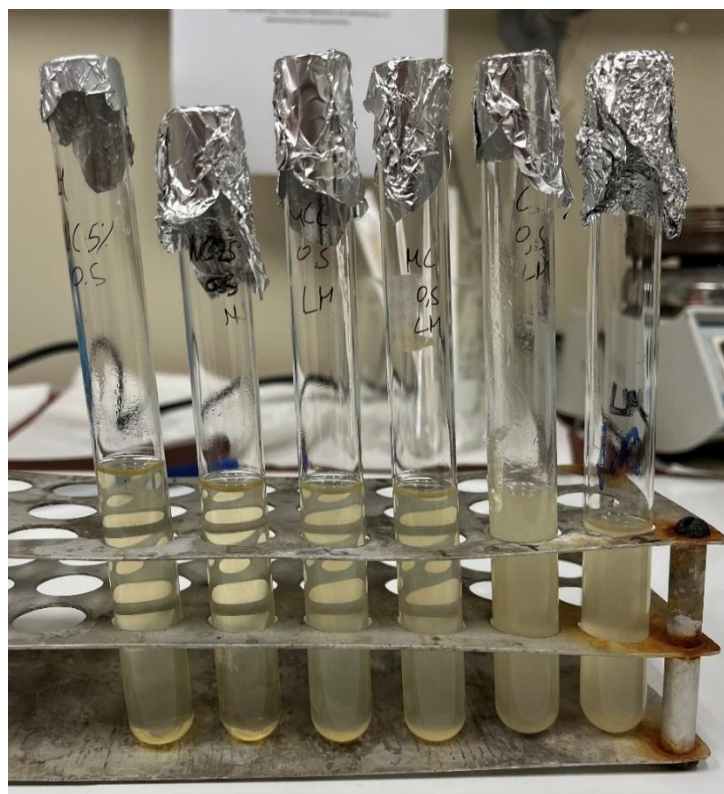

**Figure S7.** Representative image with the result of MIC in Carvacrol Treatments against *Listeria monocytogenes*



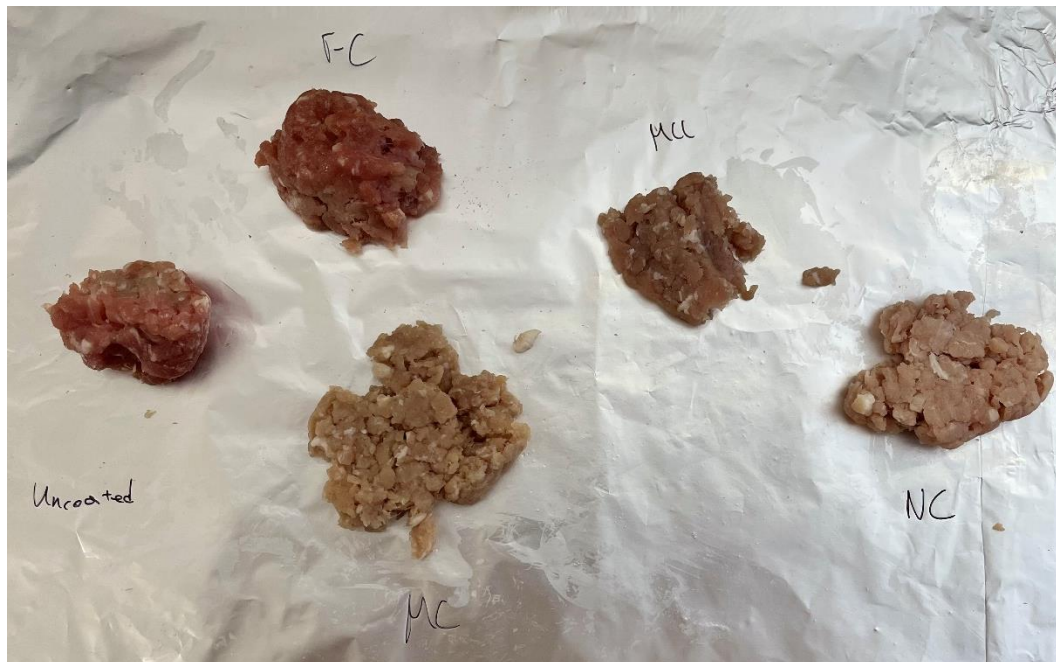

**Figure S8.** Minced meat samples after 9 days of storage at 4 °C.

*Table S1 Non-parametric in Inhibition Zones*

| Hypothesis Test Summary |                                                                                 |                                         |                     |                             |
|-------------------------|---------------------------------------------------------------------------------|-----------------------------------------|---------------------|-----------------------------|
|                         | Null Hypothesis                                                                 | Test                                    | Sig. <sup>a,b</sup> | Decision                    |
| 1                       | The distribution of <i>Listeria</i> is the same across categories of Treatment. | Independent-Samples Kruskal-Wallis Test | 0.016               | Reject the null hypothesis. |
| 2                       | The distribution of <i>Saureus</i> is the same across categories of Treatment.  | Independent-Samples Kruskal-Wallis Test | 0.016               | Reject the null hypothesis. |

a. The significance level is ,050.

b. Asymptotic significance is displayed.

| Pairwise Comparisons of Treatment |                |            |                     |       |                        |
|-----------------------------------|----------------|------------|---------------------|-------|------------------------|
| Sample 1-Sample 2                 | Test Statistic | Std. Error | Std. Test Statistic | Sig.  | Adj. Sig. <sup>a</sup> |
| FC-MC                             | -3.000         | 2.944      | -1.019              | 0.308 | 1.000                  |
| FC-MCC                            | -6.000         | 2.944      | -2.038              | 0.042 | 0.249                  |
| FC-NC                             | -9.000         | 2.944      | -3.057              | 0.002 | 0.013                  |
| MC-MCC                            | -3.000         | 2.944      | -1.019              | 0.308 | 1.000                  |
| MC-NC                             | -6.000         | 2.944      | -2.038              | 0.042 | 0.249                  |
| MCC-NC                            | -3.000         | 2.944      | -1.019              | 0.308 | 1.000                  |

Each row tests the null hypothesis that the Sample 1 and Sample 2 distributions are the same.

Asymptotic significances (2-sided tests) are displayed. The significance level is ,050.

a. Significance values have been adjusted by the Bonferroni correction for multiple tests.

Table S2 pH statistical analysis

#### Day\_0 across Treatment

#### Independent-Samples Kruskal-Wallis Test Summary

|                               |                    |
|-------------------------------|--------------------|
| Total N                       | 15                 |
| Test Statistic                | 7,943 <sup>a</sup> |
| Degree Of Freedom             | 4                  |
| Asymptotic Sig.(2-sided test) | 0.094              |

a. The test statistic is adjusted for ties.

### Pairwise Comparisons of Treatment

| Sample 1-Sample<br>2 | Test Statistic | Std. Error | Std. Test<br>Statistic | Sig.  | Adj. Sig. <sup>a</sup> |
|----------------------|----------------|------------|------------------------|-------|------------------------|
| MCC-FC               | 6.167          | 3.632      | 1.698                  | 0.090 | 0.895                  |
| MCC-NC               | -6.333         | 3.632      | -1.744                 | 0.081 | 0.812                  |
| MCC-MC               | 8.000          | 3.632      | 2.203                  | 0.028 | 0.276                  |
| MCC-Uncoated         | 9.500          | 3.632      | 2.616                  | 0.009 | 0.089                  |
| FC-NC                | -0.167         | 3.632      | -0.046                 | 0.963 | 1.000                  |
| FC-MC                | -1.833         | 3.632      | -0.505                 | 0.614 | 1.000                  |
| FC-Uncoated          | 3.333          | 3.632      | 0.918                  | 0.359 | 1.000                  |
| NC-MC                | 1.667          | 3.632      | 0.459                  | 0.646 | 1.000                  |
| NC-Uncoated          | 3.167          | 3.632      | 0.872                  | 0.383 | 1.000                  |
| MC-Uncoated          | 1.500          | 3.632      | 0.413                  | 0.680 | 1.000                  |

Each row tests the null hypothesis that the Sample 1 and Sample 2 distributions are the same.

Asymptotic significances (2-sided tests) are displayed. The significance level is ,050.

a. Significance values have been adjusted by the Bonferroni correction for multiple tests.

### Day\_3 across Treatment

#### Independent-Samples Kruskal-Wallis Test Summary

|                |                     |
|----------------|---------------------|
| Total N        | 15                  |
| Test Statistic | 12,633 <sup>a</sup> |

|                               |       |
|-------------------------------|-------|
| Degree Of Freedom             | 4     |
| Asymptotic Sig.(2-sided test) | 0.013 |

a. The test statistic is adjusted for ties.

#### Pairwise Comparisons of Treatment

| Sample 1-Sample 2 | Test Statistic | Std. Error | Std. Test Statistic | Sig.  | Adj. Sig. <sup>a</sup> |
|-------------------|----------------|------------|---------------------|-------|------------------------|
| MCC-NC            | -3.333         | 3.651      | -0.913              | 0.361 | 1.000                  |
| MCC-FC            | 5.667          | 3.651      | 1.552               | 0.121 | 1.000                  |
| MCC-Uncoated      | 10.000         | 3.651      | 2.739               | 0.006 | 0.062                  |
| MCC-MC            | 11.000         | 3.651      | 3.012               | 0.003 | 0.026                  |
| NC-FC             | 2.333          | 3.651      | 0.639               | 0.523 | 1.000                  |
| NC-Uncoated       | 6.667          | 3.651      | 1.826               | 0.068 | 0.679                  |
| NC-MC             | 7.667          | 3.651      | 2.100               | 0.036 | 0.358                  |
| FC-Uncoated       | 4.333          | 3.651      | 1.187               | 0.235 | 1.000                  |
| FC-MC             | -5.333         | 3.651      | -1.461              | 0.144 | 1.000                  |
| Uncoated-MC       | -1.000         | 3.651      | -0.274              | 0.784 | 1.000                  |

Each row tests the null hypothesis that the Sample 1 and Sample 2 distributions are the same.

Asymptotic significances (2-sided tests) are displayed. The significance level is ,050.

a. Significance values have been adjusted by the Bonferroni correction for multiple tests.

**Day\_6 across Treatment**



### Independent-Samples Kruskal-Wallis Test Summary

|                               |                     |
|-------------------------------|---------------------|
| Total N                       | 15                  |
| Test Statistic                | 12,982 <sup>a</sup> |
| Degree Of Freedom             | 4                   |
| Asymptotic Sig.(2-sided test) | 0.011               |

a. The test statistic is adjusted for ties.

### Pairwise Comparisons of Treatment

| Sample 1-Sample 2 | Test Statistic | Std. Error | Std. Test Statistic | Sig.  | Adj. Sig. <sup>a</sup> |
|-------------------|----------------|------------|---------------------|-------|------------------------|
| MCC-NC            | -1.333         | 3.648      | -0.365              | 0.715 | 1.000                  |
| MCC-FC            | 5.167          | 3.648      | 1.416               | 0.157 | 1.000                  |
| MCC-Uncoated      | 8.167          | 3.648      | 2.239               | 0.025 | 0.252                  |
| MCC-MC            | 11.167         | 3.648      | 3.061               | 0.002 | 0.022                  |
| NC-FC             | 3.833          | 3.648      | 1.051               | 0.293 | 1.000                  |
| NC-Uncoated       | 6.833          | 3.648      | 1.873               | 0.061 | 0.611                  |
| NC-MC             | 9.833          | 3.648      | 2.695               | 0.007 | 0.070                  |
| FC-Uncoated       | 3.000          | 3.648      | 0.822               | 0.411 | 1.000                  |
| FC-MC             | -6.000         | 3.648      | -1.645              | 0.100 | 1.000                  |
| Uncoated-MC       | -3.000         | 3.648      | -0.822              | 0.411 | 1.000                  |

Each row tests the null hypothesis that the Sample 1 and Sample 2 distributions are the same.

Asymptotic significances (2-sided tests) are displayed. The significance level is ,050.

a. Significance values have been adjusted by the Bonferroni correction for multiple tests.

### Day\_9 across Treatment

#### Independent-Samples Kruskal-Wallis Test Summary

|         |    |
|---------|----|
| Total N | 15 |
|---------|----|

|                               |                     |
|-------------------------------|---------------------|
| Test Statistic                | 13,500 <sup>a</sup> |
| Degree Of Freedom             | 4                   |
| Asymptotic Sig.(2-sided test) | 0.009               |

a. The test statistic is adjusted for ties.

#### Pairwise Comparisons of Treatment

| Sample 1-Sample 2 | Test Statistic | Std. Error | Std. Test Statistic | Sig.  | Adj. Sig. <sup>a</sup> |
|-------------------|----------------|------------|---------------------|-------|------------------------|
| NC-FC             | 3.000          | 3.651      | 0.822               | 0.411 | 1.000                  |
| NC-MCC            | 6.000          | 3.651      | 1.643               | 0.100 | 1.000                  |
| NC-MC             | 9.000          | 3.651      | 2.465               | 0.014 | 0.137                  |
| NC-Uncoated       | 12.000         | 3.651      | 3.286               | 0.001 | 0.010                  |
| FC-MCC            | -3.000         | 3.651      | -0.822              | 0.411 | 1.000                  |
| FC-MC             | -6.000         | 3.651      | -1.643              | 0.100 | 1.000                  |
| FC-Uncoated       | 9.000          | 3.651      | 2.465               | 0.014 | 0.137                  |
| MCC-MC            | 3.000          | 3.651      | 0.822               | 0.411 | 1.000                  |
| MCC-Uncoated      | 6.000          | 3.651      | 1.643               | 0.100 | 1.000                  |
| MC-Uncoated       | 3.000          | 3.651      | 0.822               | 0.411 | 1.000                  |

Each row tests the null hypothesis that the Sample 1 and Sample 2 distributions are the same.

Asymptotic significances (2-sided tests) are displayed. The significance level is ,050.

a. Significance values have been adjusted by the Bonferroni correction for multiple tests.

Table S3 Non-parametric in Lipid Oxidation Analysis in pork minced meat for 9 days

| Hypothesis Test Summary |                                                                       |                                         |                     |                             |
|-------------------------|-----------------------------------------------------------------------|-----------------------------------------|---------------------|-----------------------------|
|                         | Null Hypothesis                                                       | Test                                    | Sig. <sup>a,b</sup> | Decision                    |
| 1                       | The distribution of Day_0 is the same across categories of Treatment. | Independent-Samples Kruskal-Wallis Test | 0.374               | Retain the null hypothesis. |
| 2                       | The distribution of Day_3 is the same across categories of Treatment. | Independent-Samples Kruskal-Wallis Test | 0.032               | Reject the null hypothesis. |
| 3                       | The distribution of Day_6 is the same across categories of Treatment. | Independent-Samples Kruskal-Wallis Test | 0.018               | Reject the null hypothesis. |
| 4                       | The distribution of Day_9 is the same across categories of Treatment. | Independent-Samples Kruskal-Wallis Test | 0.032               | Reject the null hypothesis. |

a. The significance level is ,050.

b. Asymptotic significance is displayed.

#### Day 0 across treatment

##### Independent-Samples Kruskal-Wallis Test Summary

|                               |                    |
|-------------------------------|--------------------|
| Total N                       | 15                 |
| Test Statistic                | 4,242 <sup>a</sup> |
| Degree Of Freedom             | 4                  |
| Asymptotic Sig.(2-sided test) | 0.374              |

a. The test statistic is adjusted for ties.

##### Pairwise Comparisons of Treatment

| Sample 1-Sample 2 | Test Statistic | Std. Error | Std. Test Statistic | Sig. | Adj. Sig. <sup>a</sup> |
|-------------------|----------------|------------|---------------------|------|------------------------|
|-------------------|----------------|------------|---------------------|------|------------------------|

|              |        |       |        |       |       |
|--------------|--------|-------|--------|-------|-------|
| MCC-NC       | -0.333 | 3.619 | -0.092 | 0.927 | 1.000 |
| MCC-Uncoated | 3.000  | 3.619 | 0.829  | 0.407 | 1.000 |
| MCC-MC       | 5.167  | 3.619 | 1.428  | 0.153 | 1.000 |
| MCC-FC       | 5.667  | 3.619 | 1.566  | 0.117 | 1.000 |
| NC-Uncoated  | 2.667  | 3.619 | 0.737  | 0.461 | 1.000 |
| NC-MC        | 4.833  | 3.619 | 1.336  | 0.182 | 1.000 |
| NC-FC        | 5.333  | 3.619 | 1.474  | 0.141 | 1.000 |
| Uncoated-MC  | -2.167 | 3.619 | -0.599 | 0.549 | 1.000 |
| Uncoated-FC  | -2.667 | 3.619 | -0.737 | 0.461 | 1.000 |
| MC-FC        | 0.500  | 3.619 | 0.138  | 0.890 | 1.000 |

Each row tests the null hypothesis that the Sample 1 and Sample 2 distributions are the same.

Asymptotic significances (2-sided tests) are displayed. The significance level is ,050.

a. Significance values have been adjusted by the Bonferroni correction for multiple tests.

### Day3

#### Independent-Samples Kruskal-Wallis Test Summary

|                               |                     |
|-------------------------------|---------------------|
| Total N                       | 15                  |
| Test Statistic                | 10,561 <sup>a</sup> |
| Degree Of Freedom             | 4                   |
| Asymptotic Sig.(2-sided test) | 0.032               |

a. The test statistic is adjusted for ties.

#### Pairwise Comparisons of Treatment

| Sample 1-Sample 2 | Test Statistic | Std. Error | Std. Test Statistic | Sig.  | Adj. Sig. <sup>a</sup> |
|-------------------|----------------|------------|---------------------|-------|------------------------|
| NC-MCC            | 0.833          | 3.622      | 0.230               | 0.818 | 1.000                  |
| NC-MC             | 3.500          | 3.622      | 0.966               | 0.334 | 1.000                  |
| NC-Uncoated       | 8.667          | 3.622      | 2.393               | 0.017 | 0.167                  |
| NC-FC             | 8.667          | 3.622      | 2.393               | 0.017 | 0.167                  |
| MCC-MC            | 2.667          | 3.622      | 0.736               | 0.462 | 1.000                  |
| MCC-Uncoated      | 7.833          | 3.622      | 2.163               | 0.031 | 0.306                  |
| MCC-FC            | 7.833          | 3.622      | 2.163               | 0.031 | 0.306                  |
| MC-Uncoated       | 5.167          | 3.622      | 1.426               | 0.154 | 1.000                  |
| MC-FC             | 5.167          | 3.622      | 1.426               | 0.154 | 1.000                  |
| Uncoated-FC       | 0.000          | 3.622      | 0.000               | 1.000 | 1.000                  |

Each row tests the null hypothesis that the Sample 1 and Sample 2 distributions are the same.

Asymptotic significances (2-sided tests) are displayed. The significance level is ,050.

a. Significance values have been adjusted by the Bonferroni correction for multiple tests.

### Day6

#### Independent-Samples Kruskal-Wallis Test Summary

|                               |                     |
|-------------------------------|---------------------|
| Total N                       | 15                  |
| Test Statistic                | 11,876 <sup>a</sup> |
| Degree Of Freedom             | 4                   |
| Asymptotic Sig.(2-sided test) | 0.018               |

a. The test statistic is adjusted for ties.

#### Pairwise Comparisons of Treatment

| Sample 1-Sample 2 | Test Statistic | Std. Error | Std. Test Statistic | Sig.  | Adj. Sig. <sup>a</sup> |
|-------------------|----------------|------------|---------------------|-------|------------------------|
| NC-MCC            | 3.667          | 3.645      | 1.006               | 0.314 | 1.000                  |
| NC-FC             | 6.000          | 3.645      | 1.646               | 0.100 | 0.997                  |
| NC-MC             | 9.000          | 3.645      | 2.469               | 0.014 | 0.135                  |
| NC-Uncoated       | 11.333         | 3.645      | 3.109               | 0.002 | 0.019                  |
| MCC-FC            | 2.333          | 3.645      | 0.640               | 0.522 | 1.000                  |
| MCC-MC            | 5.333          | 3.645      | 1.463               | 0.143 | 1.000                  |
| MCC-Uncoated      | 7.667          | 3.645      | 2.103               | 0.035 | 0.354                  |
| FC-MC             | -3.000         | 3.645      | -0.823              | 0.410 | 1.000                  |
| FC-Uncoated       | 5.333          | 3.645      | 1.463               | 0.143 | 1.000                  |
| MC-Uncoated       | 2.333          | 3.645      | 0.640               | 0.522 | 1.000                  |

Each row tests the null hypothesis that the Sample 1 and Sample 2 distributions are the same.

Asymptotic significances (2-sided tests) are displayed. The significance level is ,050.

a. Significance values have been adjusted by the Bonferroni correction for multiple tests.

#### Day\_9 across Treatment

##### Independent-Samples Kruskal-Wallis Test Summary

|                               |                     |
|-------------------------------|---------------------|
| Total N                       | 15                  |
| Test Statistic                | 10,527 <sup>a</sup> |
| Degree Of Freedom             | 4                   |
| Asymptotic Sig.(2-sided test) | 0.032               |

a. The test statistic is adjusted for ties.

#### Pairwise Comparisons of Treatment

| Sample 1-Sample 2 | Test Statistic | Std. Error | Std. Test Statistic | Sig.  | Adj. Sig. <sup>a</sup> |
|-------------------|----------------|------------|---------------------|-------|------------------------|
| NC-MCC            | 4.167          | 3.648      | 1.142               | 0.253 | 1.000                  |
| NC-MC             | 6.500          | 3.648      | 1.782               | 0.075 | 0.748                  |
| NC-FC             | 8.333          | 3.648      | 2.284               | 0.022 | 0.224                  |
| NC-Uncoated       | 11.000         | 3.648      | 3.015               | 0.003 | 0.026                  |
| MCC-MC            | 2.333          | 3.648      | 0.640               | 0.522 | 1.000                  |

|              |       |       |       |       |       |
|--------------|-------|-------|-------|-------|-------|
| MCC-FC       | 4.167 | 3.648 | 1.142 | 0.253 | 1.000 |
| MCC-Uncoated | 6.833 | 3.648 | 1.873 | 0.061 | 0.611 |
| MC-FC        | 1.833 | 3.648 | 0.503 | 0.615 | 1.000 |
| MC-Uncoated  | 4.500 | 3.648 | 1.233 | 0.217 | 1.000 |
| FC-Uncoated  | 2.667 | 3.648 | 0.731 | 0.465 | 1.000 |

Each row tests the null hypothesis that the Sample 1 and Sample 2 distributions are the same.

Asymptotic significances (2-sided tests) are displayed. The significance level is ,050.

a. Significance values have been adjusted by the Bonferroni correction for multiple tests.

Table S4 Non-parametric HSD L\* value during 9 days of meat storage

**L\***

**Day0**

**Independent-Samples Kruskal-Wallis Test Summary**

|                               |                     |
|-------------------------------|---------------------|
| Total N                       | 15                  |
| Test Statistic                | 13,057 <sup>a</sup> |
| Degree Of Freedom             | 4                   |
| Asymptotic Sig.(2-sided test) | 0.011               |

a. The test statistic is adjusted for ties.

**Pairwise Comparisons of Treatment**

| Sample 1-<br>Sample 2 | Test Statistic | Std. Error | Std. Test<br>Statistic | Sig.  | Adj. Sig. <sup>a</sup> |
|-----------------------|----------------|------------|------------------------|-------|------------------------|
| MC-MCC                | -3.000         | 3.648      | -0.822                 | 0.411 | 1.000                  |
| MC-FC                 | 6.667          | 3.648      | 1.827                  | 0.068 | 0.676                  |
| MC-Uncoated           | 8.333          | 3.648      | 2.284                  | 0.022 | 0.224                  |
| MC-NC                 | -12.000        | 3.648      | -3.289                 | 0.001 | 0.010                  |
| MCC-FC                | 3.667          | 3.648      | 1.005                  | 0.315 | 1.000                  |
| MCC-Uncoated          | 5.333          | 3.648      | 1.462                  | 0.144 | 1.000                  |
| MCC-NC                | -9.000         | 3.648      | -2.467                 | 0.014 | 0.136                  |
| FC-Uncoated           | 1.667          | 3.648      | 0.457                  | 0.648 | 1.000                  |
| FC-NC                 | -5.333         | 3.648      | -1.462                 | 0.144 | 1.000                  |



|             |        |       |        |       |       |
|-------------|--------|-------|--------|-------|-------|
| Uncoated-NC | -3.667 | 3.648 | -1.005 | 0.315 | 1.000 |
|-------------|--------|-------|--------|-------|-------|

Each row tests the null hypothesis that the Sample 1 and Sample 2 distributions are the same.

Asymptotic significances (2-sided tests) are displayed. The significance level is ,050.

a. Significance values have been adjusted by the Bonferroni correction for multiple tests.

Day 3

**Independent-Samples Kruskal-Wallis Test Summary**

|                               |                     |
|-------------------------------|---------------------|
| Total N                       | 15                  |
| Test Statistic                | 13,500 <sup>a</sup> |
| Degree Of Freedom             | 4                   |
| Asymptotic Sig.(2-sided test) | 0.009               |

a. The test statistic is adjusted for ties.

**Pairwise Comparisons of Treatment**

| Sample 1-Sample 2 | Test Statistic | Std. Error | Std. Test Statistic | Sig.  | Adj. Sig. <sup>a</sup> |
|-------------------|----------------|------------|---------------------|-------|------------------------|
| MCC-MC            | 3.000          | 3.651      | 0.822               | 0.411 | 1.000                  |
| MCC-FC            | 6.000          | 3.651      | 1.643               | 0.100 | 1.000                  |
| MCC-Uncoated      | 9.000          | 3.651      | 2.465               | 0.014 | 0.137                  |
| MCC-NC            | -12.000        | 3.651      | -3.286              | 0.001 | 0.010                  |
| MC-FC             | 3.000          | 3.651      | 0.822               | 0.411 | 1.000                  |
| MC-Uncoated       | 6.000          | 3.651      | 1.643               | 0.100 | 1.000                  |
| MC-NC             | -9.000         | 3.651      | -2.465              | 0.014 | 0.137                  |
| FC-Uncoated       | 3.000          | 3.651      | 0.822               | 0.411 | 1.000                  |
| FC-NC             | -6.000         | 3.651      | -1.643              | 0.100 | 1.000                  |
| Uncoated-NC       | -3.000         | 3.651      | -0.822              | 0.411 | 1.000                  |

Each row tests the null hypothesis that the Sample 1 and Sample 2 distributions are the same.

Asymptotic significances (2-sided tests) are displayed. The significance level is ,050.

a. Significance values have been adjusted by the Bonferroni correction for multiple tests.

Day6

**Independent-Samples Kruskal-Wallis Test Summary**

|                               |                     |
|-------------------------------|---------------------|
| Total N                       | 15                  |
| Test Statistic                | 12,900 <sup>a</sup> |
| Degree Of Freedom             | 4                   |
| Asymptotic Sig.(2-sided test) | 0.012               |

a. The test statistic is adjusted for ties.

**Pairwise Comparisons of Treatment**

| Sample 1-<br>Sample 2 | Test Statistic | Std. Error | Std. Test<br>Statistic | Sig.  | Adj. Sig. <sup>a</sup> |
|-----------------------|----------------|------------|------------------------|-------|------------------------|
| MCC-FC                | 4.000          | 3.651      | 1.095                  | 0.273 | 1.000                  |
| MCC-Uncoated          | 5.000          | 3.651      | 1.369                  | 0.171 | 1.000                  |
| MCC-MC                | 9.000          | 3.651      | 2.465                  | 0.014 | 0.137                  |
| MCC-NC                | -12.000        | 3.651      | -3.286                 | 0.001 | 0.010                  |
| FC-Uncoated           | 1.000          | 3.651      | 0.274                  | 0.784 | 1.000                  |
| FC-MC                 | -5.000         | 3.651      | -1.369                 | 0.171 | 1.000                  |
| FC-NC                 | -8.000         | 3.651      | -2.191                 | 0.028 | 0.285                  |
| Uncoated-MC           | -4.000         | 3.651      | -1.095                 | 0.273 | 1.000                  |
| Uncoated-NC           | -7.000         | 3.651      | -1.917                 | 0.055 | 0.552                  |
| MC-NC                 | -3.000         | 3.651      | -0.822                 | 0.411 | 1.000                  |

Each row tests the null hypothesis that the Sample 1 and Sample 2 distributions are the same.

Asymptotic significances (2-sided tests) are displayed. The significance level is ,050.

a. Significance values have been adjusted by the Bonferroni correction for multiple tests.

Day9

**Independent-Samples Kruskal-Wallis Test Summary**

|                |                     |
|----------------|---------------------|
| Total N        | 15                  |
| Test Statistic | 10,900 <sup>a</sup> |

|                               |       |
|-------------------------------|-------|
| Degree Of Freedom             | 4     |
| Asymptotic Sig.(2-sided test) | 0.028 |

a. The test statistic is adjusted for ties.

#### Pairwise Comparisons of Treatment

| Sample 1-<br>Sample 2 | Test Statistic | Std. Error | Std. Test<br>Statistic | Sig.  | Adj. Sig. <sup>a</sup> |
|-----------------------|----------------|------------|------------------------|-------|------------------------|
| Uncoated-FC           | -5.333         | 3.651      | -1.461                 | 0.144 | 1.000                  |
| Uncoated-MC           | -6.333         | 3.651      | -1.734                 | 0.083 | 0.828                  |
| Uncoated-MCC          | -6.333         | 3.651      | -1.734                 | 0.083 | 0.828                  |
| Uncoated-NC           | -12.000        | 3.651      | -3.286                 | 0.001 | 0.010                  |
| FC-MC                 | -1.000         | 3.651      | -0.274                 | 0.784 | 1.000                  |
| FC-MCC                | -1.000         | 3.651      | -0.274                 | 0.784 | 1.000                  |
| FC-NC                 | -6.667         | 3.651      | -1.826                 | 0.068 | 0.679                  |
| MC-MCC                | 0.000          | 3.651      | 0.000                  | 1.000 | 1.000                  |
| MC-NC                 | -5.667         | 3.651      | -1.552                 | 0.121 | 1.000                  |
| MCC-NC                | -5.667         | 3.651      | -1.552                 | 0.121 | 1.000                  |

Each row tests the null hypothesis that the Sample 1 and Sample 2 distributions are the same.

Asymptotic significances (2-sided tests) are displayed. The significance level is ,050.

a. Significance values have been adjusted by the Bonferroni correction for multiple tests.

Table S5 Non-parametric a\* value during 9 days of meat storage

a\*

Day0

**Independent-Samples Kruskal-Wallis  
Test Summary**

|                               |                    |
|-------------------------------|--------------------|
| Total N                       | 15                 |
| Test Statistic                | 7,981 <sup>a</sup> |
| Degree Of Freedom             | 4                  |
| Asymptotic Sig.(2-sided test) | 0.092              |

a. The test statistic is adjusted for ties.

**Pairwise Comparisons of Treatment**

| Sample 1-Sample 2 | Test Statistic | Std. Error | Std. Test Statistic | Sig.  | Adj. Sig. <sup>a</sup> |
|-------------------|----------------|------------|---------------------|-------|------------------------|
| NC-MC             | 1.000          | 3.648      | 0.274               | 0.784 | 1.000                  |
| NC-FC             | 2.667          | 3.648      | 0.731               | 0.465 | 1.000                  |
| NC-MCC            | 3.667          | 3.648      | 1.005               | 0.315 | 1.000                  |
| NC-Uncoated       | 9.333          | 3.648      | 2.558               | 0.011 | 0.105                  |
| MC-FC             | 1.667          | 3.648      | 0.457               | 0.648 | 1.000                  |
| MC-MCC            | -2.667         | 3.648      | -0.731              | 0.465 | 1.000                  |
| MC-Uncoated       | 8.333          | 3.648      | 2.284               | 0.022 | 0.224                  |
| FC-MCC            | -1.000         | 3.648      | -0.274              | 0.784 | 1.000                  |
| FC-Uncoated       | 6.667          | 3.648      | 1.827               | 0.068 | 0.676                  |
| MCC-Uncoated      | 5.667          | 3.648      | 1.553               | 0.120 | 1.000                  |

Each row tests the null hypothesis that the Sample 1 and Sample 2 distributions are the same.

Asymptotic significances (2-sided tests) are displayed. The significance level is ,050.

a. Significance values have been adjusted by the Bonferroni correction for multiple tests.

Day 3 a\*

**Independent-Samples Kruskal-Wallis  
Test Summary**

|                               |                     |
|-------------------------------|---------------------|
| Total N                       | 15                  |
| Test Statistic                | 12,000 <sup>a</sup> |
| Degree Of Freedom             | 4                   |
| Asymptotic Sig.(2-sided test) | 0.017               |

a. The test statistic is adjusted for ties.

### Pairwise Comparisons of Treatment

| Sample 1-Sample 2 | Test Statistic | Std. Error | Std. Test Statistic | Sig.  | Adj. Sig. <sup>a</sup> |
|-------------------|----------------|------------|---------------------|-------|------------------------|
| MCC-FC            | 4.000          | 3.651      | 1.095               | 0.273 | 1.000                  |
| MCC-NC            | -6.000         | 3.651      | -1.643              | 0.100 | 1.000                  |
| MCC-MC            | 8.000          | 3.651      | 2.191               | 0.028 | 0.285                  |
| MCC-Uncoated      | 12.000         | 3.651      | 3.286               | 0.001 | 0.010                  |
| FC-NC             | -2.000         | 3.651      | -0.548              | 0.584 | 1.000                  |
| FC-MC             | -4.000         | 3.651      | -1.095              | 0.273 | 1.000                  |
| FC-Uncoated       | 8.000          | 3.651      | 2.191               | 0.028 | 0.285                  |
| NC-MC             | 2.000          | 3.651      | 0.548               | 0.584 | 1.000                  |
| NC-Uncoated       | 6.000          | 3.651      | 1.643               | 0.100 | 1.000                  |
| MC-Uncoated       | 4.000          | 3.651      | 1.095               | 0.273 | 1.000                  |

Each row tests the null hypothesis that the Sample 1 and Sample 2 distributions are the same.

Asymptotic significances (2-sided tests) are displayed. The significance level is ,050.

a. Significance values have been adjusted by the Bonferroni correction for multiple tests.

Day6

### Independent-Samples Kruskal-Wallis Test Summary

|                   |                    |
|-------------------|--------------------|
| Total N           | 15                 |
| Test Statistic    | 8,433 <sup>a</sup> |
| Degree Of Freedom | 4                  |

Asymptotic Sig.(2-  
sided test)

0.077

a. The test statistic is adjusted for ties.

#### Pairwise Comparisons of Treatment

| Sample 1-Sample 2 | Test Statistic | Std. Error | Std. Test<br>Statistic | Sig.  | Adj. Sig. <sup>a</sup> |
|-------------------|----------------|------------|------------------------|-------|------------------------|
| MCC-FC            | 4.333          | 3.651      | 1.187                  | 0.235 | 1.000                  |
| MCC-MC            | 7.000          | 3.651      | 1.917                  | 0.055 | 0.552                  |
| MCC-NC            | -7.000         | 3.651      | -1.917                 | 0.055 | 0.552                  |
| MCC-Uncoated      | 10.000         | 3.651      | 2.739                  | 0.006 | 0.062                  |
| FC-MC             | -2.667         | 3.651      | -0.730                 | 0.465 | 1.000                  |
| FC-NC             | -2.667         | 3.651      | -0.730                 | 0.465 | 1.000                  |
| FC-Uncoated       | 5.667          | 3.651      | 1.552                  | 0.121 | 1.000                  |
| MC-Uncoated       | 3.000          | 3.651      | 0.822                  | 0.411 | 1.000                  |
| NC-Uncoated       | 3.000          | 3.651      | 0.822                  | 0.411 | 1.000                  |
| MC-NC             | 0.000          | 3.651      | 0.000                  | 1.000 | 1.000                  |

Each row tests the null hypothesis that the Sample 1 and Sample 2 distributions are the same.

Asymptotic significances (2-sided tests) are displayed. The significance level is ,050.

a. Significance values have been adjusted by the Bonferroni correction for multiple tests.

Day9

#### Independent-Samples Kruskal-Wallis

##### Test Summary

|                                   |                    |
|-----------------------------------|--------------------|
| Total N                           | 15                 |
| Test Statistic                    | 8,333 <sup>a</sup> |
| Degree Of Freedom                 | 4                  |
| Asymptotic Sig.(2-<br>sided test) | 0.080              |

a. The test statistic is adjusted for ties.

#### Pairwise Comparisons of Treatment

| Sample 1-Sample 2 | Test Statistic | Std. Error | Std. Test<br>Statistic | Sig.  | Adj. Sig. <sup>a</sup> |
|-------------------|----------------|------------|------------------------|-------|------------------------|
| MC-MCC            | -1.333         | 3.651      | -0.365                 | 0.715 | 1.000                  |



|              |        |       |        |       |       |
|--------------|--------|-------|--------|-------|-------|
| MC-NC        | -2.333 | 3.651 | -0.639 | 0.523 | 1.000 |
| MC-Uncoated  | 5.333  | 3.651 | 1.461  | 0.144 | 1.000 |
| MC-FC        | 9.333  | 3.651 | 2.556  | 0.011 | 0.106 |
| MCC-NC       | -1.000 | 3.651 | -0.274 | 0.784 | 1.000 |
| MCC-Uncoated | 4.000  | 3.651 | 1.095  | 0.273 | 1.000 |
| MCC-FC       | 8.000  | 3.651 | 2.191  | 0.028 | 0.285 |
| NC-Uncoated  | 3.000  | 3.651 | 0.822  | 0.411 | 1.000 |
| NC-FC        | 7.000  | 3.651 | 1.917  | 0.055 | 0.552 |
| Uncoated-FC  | -4.000 | 3.651 | -1.095 | 0.273 | 1.000 |

Each row tests the null hypothesis that the Sample 1 and Sample 2 distributions are the same.

Asymptotic significances (2-sided tests) are displayed. The significance level is ,050.

a. Significance values have been adjusted by the Bonferroni correction for multiple tests.

Table S6 Non-parametric b\* value during 9 days of meat storage

#### Day0 b\*

##### Independent-Samples Kruskal-Wallis Test Summary

|                               |                    |
|-------------------------------|--------------------|
| Total N                       | 60                 |
| Test Statistic                | 7,030 <sup>a</sup> |
| Degree Of Freedom             | 4                  |
| Asymptotic Sig.(2-sided test) | 0.134              |

a. The test statistic is adjusted for ties.

##### Pairwise Comparisons of Treatment

| Sample 1-<br>Sample 2 | Test Statistic | Std. Error | Std. Test<br>Statistic | Sig.  | Adj. Sig. <sup>a</sup> |
|-----------------------|----------------|------------|------------------------|-------|------------------------|
| MCC-Uncoated          | 0.417          | 7.129      | 0.058                  | 0.953 | 1.000                  |
| MCC-FC                | 6.792          | 7.129      | 0.953                  | 0.341 | 1.000                  |
| MCC-MC                | 8.375          | 7.129      | 1.175                  | 0.240 | 1.000                  |

|             |         |       |        |       |       |
|-------------|---------|-------|--------|-------|-------|
| MCC-NC      | -16.292 | 7.129 | -2.285 | 0.022 | 0.223 |
| Uncoated-FC | -6.375  | 7.129 | -0.894 | 0.371 | 1.000 |
| Uncoated-MC | -7.958  | 7.129 | -1.116 | 0.264 | 1.000 |
| Uncoated-NC | -15.875 | 7.129 | -2.227 | 0.026 | 0.260 |
| FC-MC       | -1.583  | 7.129 | -0.222 | 0.824 | 1.000 |
| FC-NC       | -9.500  | 7.129 | -1.333 | 0.183 | 1.000 |
| MC-NC       | -7.917  | 7.129 | -1.110 | 0.267 | 1.000 |

Each row tests the null hypothesis that the Sample 1 and Sample 2 distributions are the same.

Asymptotic significances (2-sided tests) are displayed. The significance level is ,050.

a. Significance values have been adjusted by the Bonferroni correction for multiple tests.

#### Day3 b

##### Independent-Samples Kruskal-Wallis Test Summary

|                               |                    |
|-------------------------------|--------------------|
| Total N                       | 15                 |
| Test Statistic                | 7,205 <sup>a</sup> |
| Degree Of Freedom             | 4                  |
| Asymptotic Sig.(2-sided test) | 0.125              |

a. The test statistic is adjusted for ties.

##### Pairwise Comparisons of Treatment

| Sample 1-<br>Sample 2 | Test Statistic | Std. Error | Std. Test<br>Statistic | Sig.  | Adj. Sig. <sup>a</sup> |
|-----------------------|----------------|------------|------------------------|-------|------------------------|
| MCC-MC                | 3.667          | 3.648      | 1.005                  | 0.315 | 1.000                  |
| MCC-Uncoated          | 3.833          | 3.648      | 1.051                  | 0.293 | 1.000                  |
| MCC-FC                | 4.500          | 3.648      | 1.233                  | 0.217 | 1.000                  |
| MCC-NC                | -9.667         | 3.648      | -2.650                 | 0.008 | 0.081                  |
| MC-Uncoated           | 0.167          | 3.648      | 0.046                  | 0.964 | 1.000                  |
| MC-FC                 | 0.833          | 3.648      | 0.228                  | 0.819 | 1.000                  |
| MC-NC                 | -6.000         | 3.648      | -1.645                 | 0.100 | 1.000                  |
| Uncoated-FC           | -0.667         | 3.648      | -0.183                 | 0.855 | 1.000                  |

|             |        |       |        |       |       |
|-------------|--------|-------|--------|-------|-------|
| Uncoated-NC | -5.833 | 3.648 | -1.599 | 0.110 | 1.000 |
| FC-NC       | -5.167 | 3.648 | -1.416 | 0.157 | 1.000 |

Each row tests the null hypothesis that the Sample 1 and Sample 2 distributions are the same.

Asymptotic significances (2-sided tests) are displayed. The significance level is ,050.

a. Significance values have been adjusted by the Bonferroni correction for multiple tests.

#### Day6 b

##### Independent-Samples Kruskal-Wallis Test Summary

|                               |                    |
|-------------------------------|--------------------|
| Total N                       | 15                 |
| Test Statistic                | 4,516 <sup>a</sup> |
| Degree Of Freedom             | 4                  |
| Asymptotic Sig.(2-sided test) | 0.341              |

a. The test statistic is adjusted for ties.

##### Pairwise Comparisons of Treatment

| Sample 1-Sample 2 | Test Statistic | Std. Error | Std. Test Statistic | Sig.  | Adj. Sig. <sup>a</sup> |
|-------------------|----------------|------------|---------------------|-------|------------------------|
| MCC-MC            | 0.833          | 3.648      | 0.228               | 0.819 | 1.000                  |
| MCC-FC            | 2.333          | 3.648      | 0.640               | 0.522 | 1.000                  |
| MCC-Uncoated      | 4.167          | 3.648      | 1.142               | 0.253 | 1.000                  |
| MCC-NC            | -6.833         | 3.648      | -1.873              | 0.061 | 0.611                  |
| MC-FC             | 1.500          | 3.648      | 0.411               | 0.681 | 1.000                  |
| MC-Uncoated       | 3.333          | 3.648      | 0.914               | 0.361 | 1.000                  |
| MC-NC             | -6.000         | 3.648      | -1.645              | 0.100 | 1.000                  |
| FC-Uncoated       | 1.833          | 3.648      | 0.503               | 0.615 | 1.000                  |
| FC-NC             | -4.500         | 3.648      | -1.233              | 0.217 | 1.000                  |
| Uncoated-NC       | -2.667         | 3.648      | -0.731              | 0.465 | 1.000                  |

Each row tests the null hypothesis that the Sample 1 and Sample 2 distributions are the same.

Asymptotic significances (2-sided tests) are displayed. The significance level is ,050.

a. Significance values have been adjusted by the Bonferroni correction for multiple tests.

**Day9 b****Independent-Samples Kruskal-Wallis Test Summary**

|                               |                    |
|-------------------------------|--------------------|
| Total N                       | 15                 |
| Test Statistic                | 4,767 <sup>a</sup> |
| Degree Of Freedom             | 4                  |
| Asymptotic Sig.(2-sided test) | 0.312              |

a. The test statistic is adjusted for ties.

**Pairwise Comparisons of Treatment**

| Sample 1-<br>Sample 2 | Test Statistic | Std. Error | Std. Test<br>Statistic | Sig.  | Adj. Sig. <sup>a</sup> |
|-----------------------|----------------|------------|------------------------|-------|------------------------|
| Uncoated-MCC          | -1.667         | 3.651      | -0.456                 | 0.648 | 1.000                  |
| Uncoated-FC           | -3.000         | 3.651      | -0.822                 | 0.411 | 1.000                  |
| Uncoated-NC           | -4.667         | 3.651      | -1.278                 | 0.201 | 1.000                  |
| Uncoated-MC           | -7.333         | 3.651      | -2.008                 | 0.045 | 0.446                  |
| MCC-FC                | 1.333          | 3.651      | 0.365                  | 0.715 | 1.000                  |
| MCC-NC                | -3.000         | 3.651      | -0.822                 | 0.411 | 1.000                  |
| MCC-MC                | 5.667          | 3.651      | 1.552                  | 0.121 | 1.000                  |
| FC-NC                 | -1.667         | 3.651      | -0.456                 | 0.648 | 1.000                  |
| FC-MC                 | -4.333         | 3.651      | -1.187                 | 0.235 | 1.000                  |
| NC-MC                 | 2.667          | 3.651      | 0.730                  | 0.465 | 1.000                  |

Each row tests the null hypothesis that the Sample 1 and Sample 2 distributions are the same.

Asymptotic significances (2-sided tests) are displayed. The significance level is ,050.

a. Significance values have been adjusted by the Bonferroni correction for multiple tests.

Table S7 Non-parametric in mesophilic analysis of stored fresh pork minced meat for 9 days

**Nonparametric Tests**

### Hypothesis Test Summary

|   | Null Hypothesis                                                     | Test                                    | Sig. <sup>a,b</sup> | Decision                    |
|---|---------------------------------------------------------------------|-----------------------------------------|---------------------|-----------------------------|
| 1 | The distribution of DAY_0 is the same across categories of Samples. | Independent-Samples Kruskal-Wallis Test | 1.000               | Retain the null hypothesis. |
| 2 | The distribution of DAY_3 is the same across categories of Samples. | Independent-Samples Kruskal-Wallis Test | 0.012               | Reject the null hypothesis. |
| 3 | The distribution of DAY_6 is the same across categories of Samples. | Independent-Samples Kruskal-Wallis Test | 0.012               | Reject the null hypothesis. |
| 4 | The distribution of DAY_9 is the same across categories of Samples. | Independent-Samples Kruskal-Wallis Test | 0.012               | Reject the null hypothesis. |

a. The significance level is ,050.

b. Asymptotic significance is displayed.

### DAY\_0 across Samples Independent-Samples Kruskal-Wallis Test Summary

|                   |                   |
|-------------------|-------------------|
| Total N           | 15                |
| Test Statistic    | ,000 <sup>a</sup> |
| Degree Of Freedom | 4                 |

|                                      |       |
|--------------------------------------|-------|
| Asymptotic<br>Sig.(2-<br>sided test) | 1.000 |
|--------------------------------------|-------|

a. The test statistic is  
adjusted for ties.

### Pairwise Comparisons of Samples

| Sample 1-<br>Sample 2 | Test<br>Statistic | Std. Error | Std. Test Statistic | Sig.  | Adj.<br>Sig. <sup>a</sup> |
|-----------------------|-------------------|------------|---------------------|-------|---------------------------|
| Uncoated-<br>FC       | 0.000             | 3.450      | 0.000               | 1.000 | 1.000                     |
| Uncoated-<br>MC       | 0.000             | 3.450      | 0.000               | 1.000 | 1.000                     |
| Uncoated-<br>MCC      | 0.000             | 3.450      | 0.000               | 1.000 | 1.000                     |
| Uncoated-<br>NC       | 0.000             | 3.450      | 0.000               | 1.000 | 1.000                     |
| FC-MC                 | 0.000             | 3.450      | 0.000               | 1.000 | 1.000                     |
| FC-MCC                | 0.000             | 3.450      | 0.000               | 1.000 | 1.000                     |
| FC-NC                 | 0.000             | 3.450      | 0.000               | 1.000 | 1.000                     |
| MC-MCC                | 0.000             | 3.450      | 0.000               | 1.000 | 1.000                     |
| MC-NC                 | 0.000             | 3.450      | 0.000               | 1.000 | 1.000                     |
| MCC-NC                | 0.000             | 3.450      | 0.000               | 1.000 | 1.000                     |

Each row tests the null hypothesis that the Sample 1 and Sample 2 distributions are the same.  
Asymptotic significances (2-sided tests) are displayed. The significance level is ,050.



a. Significance values have been adjusted by the Bonferroni correction for multiple tests.

**DAY\_3 across Samples**  
**Independent-Samples**  
**Kruskal-Wallis Test**  
**Summary**

|                               |                     |
|-------------------------------|---------------------|
| Total N                       | 15                  |
| Test Statistic                | 12,900 <sup>a</sup> |
| Degree Of Freedom             | 4                   |
| Asymptotic Sig.(2-sided test) | 0.012               |

a. The test statistic is adjusted for ties.

**Pairwise Comparisons of Samples**

| Sample 1-<br>Sample 2 | Test<br>Statistic | Std. Error | Std. Test Statistic | Sig.  | Adj.<br>Sig. <sup>a</sup> |
|-----------------------|-------------------|------------|---------------------|-------|---------------------------|
| NC-MCC                | 3.000             | 3.651      | 0.822               | 0.411 | 1.000                     |
| NC-MC                 | 7.000             | 3.651      | 1.917               | 0.055 | 0.552                     |
| NC-FC                 | 8.000             | 3.651      | 2.191               | 0.028 | 0.285                     |
| NC-<br>Uncoated       | 12.000            | 3.651      | 3.286               | 0.001 | 0.010                     |
| MCC-MC                | 4.000             | 3.651      | 1.095               | 0.273 | 1.000                     |

|                  |       |       |       |       |       |
|------------------|-------|-------|-------|-------|-------|
| MCC-FC           | 5.000 | 3.651 | 1.369 | 0.171 | 1.000 |
| MCC-<br>Uncoated | 9.000 | 3.651 | 2.465 | 0.014 | 0.137 |
| MC-FC            | 1.000 | 3.651 | 0.274 | 0.784 | 1.000 |
| MC-<br>Uncoated  | 5.000 | 3.651 | 1.369 | 0.171 | 1.000 |
| FC-<br>Uncoated  | 4.000 | 3.651 | 1.095 | 0.273 | 1.000 |

Each row tests the null hypothesis that the Sample 1 and Sample 2 distributions are the same. Asymptotic significances (2-sided tests) are displayed. The significance level is ,050.

a. Significance values have been adjusted by the Bonferroni correction for multiple tests.

#### DAY\_6 across Samples

##### Independent-Samples

##### Kruskal-Wallis Test

##### Summary

|                                      |                     |
|--------------------------------------|---------------------|
| Total N                              | 15                  |
| Test<br>Statistic                    | 12,928 <sup>a</sup> |
| Degree Of<br>Freedom                 | 4                   |
| Asymptotic<br>Sig.(2-<br>sided test) | 0.012               |

a. The test statistic is adjusted for ties.

#### Pairwise Comparisons of Samples

| Sample 1-<br>Sample 2 | Test<br>Statistic | Std. Error | Std. Test Statistic | Sig.  | Adj.<br>Sig. <sup>a</sup> |
|-----------------------|-------------------|------------|---------------------|-------|---------------------------|
| NC-MCC                | 3.167             | 3.642      | 0.870               | 0.385 | 1.000                     |
| NC-FC                 | 6.500             | 3.642      | 1.785               | 0.074 | 0.743                     |
| NC-MC                 | 8.333             | 3.642      | 2.288               | 0.022 | 0.221                     |
| NC-<br>Uncoated       | 12.000            | 3.642      | 3.295               | 0.001 | 0.010                     |
| MCC-FC                | 3.333             | 3.642      | 0.915               | 0.360 | 1.000                     |
| MCC-MC                | 5.167             | 3.642      | 1.419               | 0.156 | 1.000                     |
| MCC-<br>Uncoated      | 8.833             | 3.642      | 2.426               | 0.015 | 0.153                     |
| FC-MC                 | -1.833            | 3.642      | -0.503              | 0.615 | 1.000                     |
| FC-<br>Uncoated       | 5.500             | 3.642      | 1.510               | 0.131 | 1.000                     |
| MC-<br>Uncoated       | 3.667             | 3.642      | 1.007               | 0.314 | 1.000                     |

Each row tests the null hypothesis that the Sample 1 and Sample 2 distributions are the same. Asymptotic significances (2-sided tests) are displayed. The significance level is ,050.

a. Significance values have been adjusted by the Bonferroni correction for multiple tests.

**DAY\_9 across Samples**  
**Independent-Samples**  
**Kruskal-Wallis Test**  
**Summary**

|                   |                     |
|-------------------|---------------------|
| Total N           | 15                  |
| Test<br>Statistic | 12,928 <sup>a</sup> |

|                               |       |
|-------------------------------|-------|
| Degree Of Freedom             | 4     |
| Asymptotic Sig.(2-sided test) | 0.012 |

a. The test statistic is adjusted for ties.

| Pairwise Comparisons of Samples |                |            |                     |       |                        |
|---------------------------------|----------------|------------|---------------------|-------|------------------------|
| Sample 1-Sample 2               | Test Statistic | Std. Error | Std. Test Statistic | Sig.  | Adj. Sig. <sup>a</sup> |
| NC-MCC                          | 3.167          | 3.642      | 0.870               | 0.385 | 1.000                  |
| NC-FC                           | 6.500          | 3.642      | 1.785               | 0.074 | 0.743                  |
| NC-MC                           | 8.333          | 3.642      | 2.288               | 0.022 | 0.221                  |
| NC-Uncoated                     | 12.000         | 3.642      | 3.295               | 0.001 | 0.010                  |
| MCC-FC                          | 3.333          | 3.642      | 0.915               | 0.360 | 1.000                  |
| MCC-MC                          | 5.167          | 3.642      | 1.419               | 0.156 | 1.000                  |
| MCC-Uncoated                    | 8.833          | 3.642      | 2.426               | 0.015 | 0.153                  |
| FC-MC                           | -1.833         | 3.642      | -0.503              | 0.615 | 1.000                  |
| FC-Uncoated                     | 5.500          | 3.642      | 1.510               | 0.131 | 1.000                  |
| MC-Uncoated                     | 3.667          | 3.642      | 1.007               | 0.314 | 1.000                  |

Each row tests the null hypothesis that the Sample 1 and Sample 2 distributions are the same.

Asymptotic significances (2-sided tests) are displayed. The significance level is ,050.

a. Significance values have been adjusted by the Bonferroni correction for multiple tests.

Table S8 LAB bacteria microbiological analysis in pork minced meat

### LAB Nonparametric Tests

#### Hypothesis Test Summary

|   | Null Hypothesis                                                     | Test                                    | Sig.a,b | Decision                    |
|---|---------------------------------------------------------------------|-----------------------------------------|---------|-----------------------------|
| 1 | The distribution of DAY_0 is the same across categories of Samples. | Independent-Samples Kruskal-Wallis Test | 1,000   | Retain the null hypothesis. |

|   |                                                                     |                                         |      |                             |
|---|---------------------------------------------------------------------|-----------------------------------------|------|-----------------------------|
| 2 | The distribution of DAY_3 is the same across categories of Samples. | Independent-Samples Kruskal-Wallis Test | ,015 | Reject the null hypothesis. |
| 3 | The distribution of DAY_6 is the same across categories of Samples. | Independent-Samples Kruskal-Wallis Test | ,011 | Reject the null hypothesis. |
| 4 | The distribution of DAY_9 is the same across categories of Samples. | Independent-Samples Kruskal-Wallis Test | ,010 | Reject the null hypothesis. |

a The significance level is ,050.

b Asymptotic significance is displayed.

#### DAY\_0 across Samples

##### Independent-Samples Kruskal-Wallis Test Summary

|                               |       |
|-------------------------------|-------|
| Total N                       | 15    |
| Test Statistic                | ,000a |
| Degree Of Freedom             | 4     |
| Asymptotic Sig.(2-sided test) | 1,000 |

a The test statistic is adjusted for ties.

#### Pairwise Comparisons of Samples

| Sample 1-<br>Sample 2 | Test Statistic | Std. Error | Std.<br>Test<br>Statistic<br>c | Sig.  | Adj.<br>Sig. <sup>a</sup> |
|-----------------------|----------------|------------|--------------------------------|-------|---------------------------|
| Uncoated-FC           | 0.000          | 3.450      | 0.000                          | 1.000 | 1.000                     |
| Uncoated-MC           | 0.000          | 3.450      | 0.000                          | 1.000 | 1.000                     |
| Uncoated-MCC          | 0.000          | 3.450      | 0.000                          | 1.000 | 1.000                     |
| Uncoated-NC           | 0.000          | 3.450      | 0.000                          | 1.000 | 1.000                     |
| FC-MC                 | 0.000          | 3.450      | 0.000                          | 1.000 | 1.000                     |
| FC-MCC                | 0.000          | 3.450      | 0.000                          | 1.000 | 1.000                     |

|        |       |       |       |       |       |
|--------|-------|-------|-------|-------|-------|
| FC-NC  | 0.000 | 3.450 | 0.000 | 1.000 | 1.000 |
| MC-MCC | 0.000 | 3.450 | 0.000 | 1.000 | 1.000 |
| MC-NC  | 0.000 | 3.450 | 0.000 | 1.000 | 1.000 |
| MCC-NC | 0.000 | 3.450 | 0.000 | 1.000 | 1.000 |

Each row tests the null hypothesis that the Sample 1 and Sample 2 distributions are the same.

Asymptotic significances (2-sided tests) are displayed. The significance level is ,050.

a. Significance values have been adjusted by the Bonferroni correction for multiple tests.

**DAY\_3 across Samples**

**Independent-Samples Kruskal-Wallis Test Summary**

|                   |                     |
|-------------------|---------------------|
| Total N           | 15                  |
| Test Statistic    | 12,341 <sup>a</sup> |
| Degree Of Freedom | 4                   |



Asymptotic  
Sig.(2-sided  
test)

0.015

a. The test statistic is adjusted for ties.

#### Pairwise Comparisons of Samples

| Sample 1-<br>Sample 2 | Test Statistic | Std. Error | Std.<br>Test<br>Statistic | Sig.  | Adj.<br>Sig. <sup>a</sup> |
|-----------------------|----------------|------------|---------------------------|-------|---------------------------|
| NC-MCC                | 3.000          | 3.632      | 0.826                     | 0.409 | 1.000                     |
| NC-MC                 | 6.833          | 3.632      | 1.881                     | 0.060 | 0.599                     |
| NC-FC                 | 9.000          | 3.632      | 2.478                     | 0.013 | 0.132                     |
| NC-Uncoated           | 11.167         | 3.632      | 3.075                     | 0.002 | 0.021                     |
| MCC-MC                | 3.833          | 3.632      | 1.055                     | 0.291 | 1.000                     |
| MCC-FC                | 6.000          | 3.632      | 1.652                     | 0.099 | 0.985                     |
| MCC-Uncoated          | 8.167          | 3.632      | 2.249                     | 0.025 | 0.245                     |
| MC-FC                 | 2.167          | 3.632      | 0.597                     | 0.551 | 1.000                     |
| MC-Uncoated           | 4.333          | 3.632      | 1.193                     | 0.233 | 1.000                     |
| FC-Uncoated           | 2.167          | 3.632      | 0.597                     | 0.551 | 1.000                     |

Each row tests the null hypothesis that the Sample 1 and Sample 2 distributions are the same.

Asymptotic significances (2-sided tests) are displayed. The significance level is ,050.

a. Significance values have been adjusted by the Bonferroni correction for multiple tests.

## DAY\_6 across Samples

### Independent-Samples Kruskal-Wallis Test Summary

|                               |                     |
|-------------------------------|---------------------|
| Total N                       | 15                  |
| Test Statistic                | 13,080 <sup>a</sup> |
| Degree Of Freedom             | 4                   |
| Asymptotic Sig.(2-sided test) | 0.011               |

a. The test statistic is adjusted for ties.

### Pairwise Comparisons of Samples

| Sample 1-<br>Sample 2 | Test Statistic | Std. Error | Std.<br>Test<br>Statistic | Sig.  | Adj.<br>Sig. <sup>a</sup> |
|-----------------------|----------------|------------|---------------------------|-------|---------------------------|
| NC-MCC                | 3.000          | 3.645      | 0.823                     | 0.410 | 1.000                     |
| NC-FC                 | 6.667          | 3.645      | 1.829                     | 0.067 | 0.674                     |
| NC-MC                 | 8.333          | 3.645      | 2.286                     | 0.022 | 0.222                     |
| NC-Uncoated           | 12.000         | 3.645      | 3.292                     | 0.001 | 0.010                     |
| MCC-FC                | 3.667          | 3.645      | 1.006                     | 0.314 | 1.000                     |
| MCC-MC                | 5.333          | 3.645      | 1.463                     | 0.143 | 1.000                     |
| MCC-Uncoated          | 9.000          | 3.645      | 2.469                     | 0.014 | 0.135                     |

|             |        |       |        |       |       |
|-------------|--------|-------|--------|-------|-------|
| FC-MC       | -1.667 | 3.645 | -0.457 | 0.647 | 1.000 |
| FC-Uncoated | 5.333  | 3.645 | 1.463  | 0.143 | 1.000 |
| MC-Uncoated | 3.667  | 3.645 | 1.006  | 0.314 | 1.000 |

Each row tests the null hypothesis that the Sample 1 and Sample 2 distributions are the same.

Asymptotic significances (2-sided tests) are displayed. The significance level is ,050.

a. Significance values have been adjusted by the Bonferroni correction for multiple tests.

#### DAY\_9 across Samples

##### Independent-Samples Kruskal-Wallis Test Summary

|                               |                     |
|-------------------------------|---------------------|
| Total N                       | 15                  |
| Test Statistic                | 13,382 <sup>a</sup> |
| Degree Of Freedom             | 4                   |
| Asymptotic Sig.(2-sided test) | 0.010               |

a. The test statistic is adjusted for ties.

##### Pairwise Comparisons of Samples

| Sample 1-<br>Sample 2 | Test Statistic | Std. Error | Std.<br>Test<br>Statisti<br>c | Sig.  | Adj.<br>Sig. <sup>a</sup> |
|-----------------------|----------------|------------|-------------------------------|-------|---------------------------|
| NC-MCC                | 3.000          | 3.648      | 0.822                         | 0.411 | 1.000                     |

|              |        |       |       |       |       |
|--------------|--------|-------|-------|-------|-------|
| NC-MC        | 6.167  | 3.648 | 1.690 | 0.091 | 0.910 |
| NC-FC        | 8.833  | 3.648 | 2.421 | 0.015 | 0.155 |
| NC-Uncoated  | 12.000 | 3.648 | 3.289 | 0.001 | 0.010 |
| MCC-MC       | 3.167  | 3.648 | 0.868 | 0.385 | 1.000 |
| MCC-FC       | 5.833  | 3.648 | 1.599 | 0.110 | 1.000 |
| MCC-Uncoated | 9.000  | 3.648 | 2.467 | 0.014 | 0.136 |
| MC-FC        | 2.667  | 3.648 | 0.731 | 0.465 | 1.000 |
| MC-Uncoated  | 5.833  | 3.648 | 1.599 | 0.110 | 1.000 |
| FC-Uncoated  | 3.167  | 3.648 | 0.868 | 0.385 | 1.000 |

Each row tests the null hypothesis that the Sample 1 and Sample 2 distributions are the same.

Asymptotic significances (2-sided tests) are displayed. The significance level is ,050.

a. Significance values have been adjusted by the Bonferroni correction for multiple tests.

Table S9 Psychrotrophic bacteria microbiological analysis in pork minced meat

### Nonparametric Tests

| Hypothesis Test Summary |                                                                     |                                         |                     |                             |
|-------------------------|---------------------------------------------------------------------|-----------------------------------------|---------------------|-----------------------------|
|                         | Null Hypothesis                                                     | Test                                    | Sig. <sup>a,b</sup> | Decision                    |
| 1                       | The distribution of DAY_0 is the same across categories of Samples. | Independent-Samples Kruskal-Wallis Test | 1.000               | Retain the null hypothesis. |
| 2                       | The distribution of DAY_3 is the same across                        | Independent-Samples Kruskal-Wallis Test | 0.014               | Reject the null hypothesis. |

|   |                                                                     |                                         |       |                             |
|---|---------------------------------------------------------------------|-----------------------------------------|-------|-----------------------------|
|   | categories of Samples.                                              |                                         |       |                             |
| 3 | The distribution of DAY_6 is the same across categories of Samples. | Independent-Samples Kruskal-Wallis Test | 0.013 | Reject the null hypothesis. |
| 4 | The distribution of DAY_9 is the same across categories of Samples. | Independent-Samples Kruskal-Wallis Test | 0.010 | Reject the null hypothesis. |

a. The significance level is ,050.

b. Asymptotic significance is displayed.

#### DAY\_0 across Samples

##### Independent-Samples Kruskal-Wallis Test Summary

|                               |       |
|-------------------------------|-------|
| Total N                       | 15    |
| Test Statistic                | ,000a |
| Degree Of Freedom             | 4     |
| Asymptotic Sig.(2-sided test) | 1,000 |

a The test statistic is adjusted for ties.

##### Pairwise Comparisons of Samples

| Sample 1-Sample 2 | Test Statistic | Std. Error | Std. Test Statistic | Sig.  | Adj. Sig. <sup>a</sup> |
|-------------------|----------------|------------|---------------------|-------|------------------------|
| Uncoated-FC       | 0.000          | 3.450      | 0.000               | 1.000 | 1.000                  |
| Uncoated-MC       | 0.000          | 3.450      | 0.000               | 1.000 | 1.000                  |
| Uncoated-MCC      | 0.000          | 3.450      | 0.000               | 1.000 | 1.000                  |

|             |       |       |       |       |       |
|-------------|-------|-------|-------|-------|-------|
| Uncoated-NC | 0.000 | 3.450 | 0.000 | 1.000 | 1.000 |
| FC-MC       | 0.000 | 3.450 | 0.000 | 1.000 | 1.000 |
| FC-MCC      | 0.000 | 3.450 | 0.000 | 1.000 | 1.000 |
| FC-NC       | 0.000 | 3.450 | 0.000 | 1.000 | 1.000 |
| MC-MCC      | 0.000 | 3.450 | 0.000 | 1.000 | 1.000 |
| MC-NC       | 0.000 | 3.450 | 0.000 | 1.000 | 1.000 |
| MCC-NC      | 0.000 | 3.450 | 0.000 | 1.000 | 1.000 |

Each row tests the null hypothesis that the Sample 1 and Sample 2 distributions are the same.

Asymptotic significances (2-sided tests) are displayed. The significance level is ,050.

a. Significance values have been adjusted by the Bonferroni correction for multiple tests.

### DAY\_3 across Samples

#### Independent-Samples Kruskal-Wallis Test Summary

|                               |                     |
|-------------------------------|---------------------|
| Total N                       | 15                  |
| Test Statistic                | 12,534 <sup>a</sup> |
| Degree Of Freedom             | 4                   |
| Asymptotic Sig.(2-sided test) | 0.01379             |

a. The test statistic is adjusted for ties.

#### Pairwise Comparisons of Samples

| Sample 1-Sample 2 | Test Statistic | Std. Error | Std. Test Statistic | Sig.  | Adj. Sig. <sup>a</sup> |
|-------------------|----------------|------------|---------------------|-------|------------------------|
| NC-MCC            | 3.333          | 3.632      | 0.918               | 0.359 | 1.000                  |
| NC-FC             | 7.333          | 3.632      | 2.019               | 0.043 | 0.435                  |
| NC-MC             | 7.333          | 3.632      | 2.019               | 0.043 | 0.435                  |
| NC-Uncoated       | 12.000         | 3.632      | 3.304               | 0.001 | 0.010                  |
| MCC-FC            | 4.000          | 3.632      | 1.101               | 0.271 | 1.000                  |
| MCC-MC            | 4.000          | 3.632      | 1.101               | 0.271 | 1.000                  |

|              |       |       |       |       |       |
|--------------|-------|-------|-------|-------|-------|
| MCC-Uncoated | 8.667 | 3.632 | 2.386 | 0.017 | 0.170 |
| FC-Uncoated  | 4.667 | 3.632 | 1.285 | 0.199 | 1.000 |
| MC-Uncoated  | 4.667 | 3.632 | 1.285 | 0.199 | 1.000 |
| FC-MC        | 0.000 | 3.632 | 0.000 | 1.000 | 1.000 |

Each row tests the null hypothesis that the Sample 1 and Sample 2 distributions are the same.

Asymptotic significances (2-sided tests) are displayed. The significance level is ,050.

a. Significance values have been adjusted by the Bonferroni correction for multiple tests.

#### DAY\_6 across Samples

##### Independent-Samples Kruskal-Wallis Test

###### Summary

|                               |                     |
|-------------------------------|---------------------|
| Total N                       | 15                  |
| Test Statistic                | 12,657 <sup>a</sup> |
| Degree Of Freedom             | 4                   |
| Asymptotic Sig.(2-sided test) | 0.013               |

a. The test statistic is adjusted for ties.

##### Pairwise Comparisons of Samples

| Sample 1-Sample 2 | Test Statistic | Std. Error | Std. Test Statistic | Sig.  | Adj. Sig. <sup>a</sup> |
|-------------------|----------------|------------|---------------------|-------|------------------------|
| NC-MCC            | 1.667          | 3.638      | 0.458               | 0.647 | 1.000                  |
| NC-MC             | 6.000          | 3.638      | 1.649               | 0.099 | 0.991                  |
| NC-FC             | 7.667          | 3.638      | 2.107               | 0.035 | 0.351                  |

|              |        |       |       |       |       |
|--------------|--------|-------|-------|-------|-------|
| NC-Uncoated  | 11.333 | 3.638 | 3.115 | 0.002 | 0.018 |
| MCC-MC       | 4.333  | 3.638 | 1.191 | 0.234 | 1.000 |
| MCC-FC       | 6.000  | 3.638 | 1.649 | 0.099 | 0.991 |
| MCC-Uncoated | 9.667  | 3.638 | 2.657 | 0.008 | 0.079 |
| MC-FC        | 1.667  | 3.638 | 0.458 | 0.647 | 1.000 |
| MC-Uncoated  | 5.333  | 3.638 | 1.466 | 0.143 | 1.000 |
| FC-Uncoated  | 3.667  | 3.638 | 1.008 | 0.314 | 1.000 |

Each row tests the null hypothesis that the Sample 1 and Sample 2 distributions are the same.

Asymptotic significances (2-sided tests) are displayed. The significance level is ,050.

a. Significance values have been adjusted by the Bonferroni correction for multiple tests.

#### DAY\_9 across Samples

##### Independent-Samples Kruskal-Wallis Test

###### Summary

|                               |                     |
|-------------------------------|---------------------|
| Total N                       | 15                  |
| Test Statistic                | 13,382 <sup>a</sup> |
| Degree Of Freedom             | 4                   |
| Asymptotic Sig.(2-sided test) | 0.010               |

a. The test statistic is adjusted for ties.

##### Pairwise Comparisons of Samples

| Sample 1-Sample 2 | Test Statistic | Std. Error | Std. Test Statistic | Sig.  | Adj. Sig. <sup>a</sup> |
|-------------------|----------------|------------|---------------------|-------|------------------------|
| NC-MCC            | 3.000          | 3.648      | 0.822               | 0.411 | 1.000                  |
| NC-MC             | 6.167          | 3.648      | 1.690               | 0.091 | 0.910                  |
| NC-FC             | 8.833          | 3.648      | 2.421               | 0.015 | 0.155                  |
| NC-Uncoated       | 12.000         | 3.648      | 3.289               | 0.001 | 0.010                  |
| MCC-MC            | 3.167          | 3.648      | 0.868               | 0.385 | 1.000                  |
| MCC-FC            | 5.833          | 3.648      | 1.599               | 0.110 | 1.000                  |
| MCC-Uncoated      | 9.000          | 3.648      | 2.467               | 0.014 | 0.136                  |



|             |       |       |       |       |       |
|-------------|-------|-------|-------|-------|-------|
| MC-FC       | 2.667 | 3.648 | 0.731 | 0.465 | 1.000 |
| MC-Uncoated | 5.833 | 3.648 | 1.599 | 0.110 | 1.000 |
| FC-Uncoated | 3.167 | 3.648 | 0.868 | 0.385 | 1.000 |

Each row tests the null hypothesis that the Sample 1 and Sample 2 distributions are the same.

Asymptotic significances (2-sided tests) are displayed. The significance level is ,050.

a. Significance values have been adjusted by the Bonferroni correction for multiple tests.

**Table S10 Non-parametrics of Sensory test**

| Hypothesis Test Summary |                                                                                    |                                         |                     |                             |
|-------------------------|------------------------------------------------------------------------------------|-----------------------------------------|---------------------|-----------------------------|
|                         | Null Hypothesis                                                                    | Test                                    | Sig. <sup>a,b</sup> | Decision                    |
| 1                       | The distribution of Results_Appearence is the same across categories of Treatment. | Independent-Samples Kruskal-Wallis Test | 0.000               | Reject the null hypothesis. |
| 2                       | The distribution of Results_Odor is the same across categories of Treatment.       | Independent-Samples Kruskal-Wallis Test | 0.000               | Reject the null hypothesis. |
| 3                       | The distribution of Results_Colour is the same across categories of Treatment.     | Independent-Samples Kruskal-Wallis Test | 0.000               | Reject the null hypothesis. |
| 4                       | The distribution of Results_Texture is the same across categories of Treatment.    | Independent-Samples Kruskal-Wallis Test | 0.709               | Retain the null hypothesis. |

a. The significance level is ,050.

b. Asymptotic significance is displayed.

#### Pairwise Comparisons of Treatment - Appearance

| Sample 1-Sample 2 | Test Statistic | Std. Error | Std. Test Statistic | Sig.  | Adj. Sig. <sup>a</sup> |
|-------------------|----------------|------------|---------------------|-------|------------------------|
| NC-MCC            | 46.783         | 15.639     | 2.992               | 0.003 | 0.028                  |
| NC-MC             | 75.317         | 15.639     | 4.816               | 0.000 | 0.000                  |
| NC-FC             | 121.783        | 15.639     | 7.787               | 0.000 | 0.000                  |
| NC-Uncoated       | 190.117        | 15.639     | 12.157              | 0.000 | 0.000                  |
| MCC-MC            | 28.533         | 15.639     | 1.825               | 0.068 | 0.681                  |
| MCC-FC            | 75.000         | 15.639     | 4.796               | 0.000 | 0.000                  |
| MCC-Uncoated      | 143.333        | 15.639     | 9.165               | 0.000 | 0.000                  |
| MC-FC             | 46.467         | 15.639     | 2.971               | 0.003 | 0.030                  |
| MC-Uncoated       | 114.800        | 15.639     | 7.341               | 0.000 | 0.000                  |
| FC-Uncoated       | 68.333         | 15.639     | 4.370               | 0.000 | 0.000                  |

Each row tests the null hypothesis that the Sample 1 and Sample 2 distributions are the same.

Asymptotic significances (2-sided tests) are displayed. The significance level is ,050.

a. Significance values have been adjusted by the Bonferroni correction for multiple tests.

#### Pairwise Comparisons of Treatment - Colour

| Sample 1-Sample 2 | Test Statistic | Std. Error | Std. Test Statistic | Sig.  | Adj. Sig. <sup>a</sup> |
|-------------------|----------------|------------|---------------------|-------|------------------------|
| NC-MCC            | 47.183         | 15.496     | 3.045               | 0.002 | 0.023                  |
| NC-MC             | 84.083         | 15.496     | 5.426               | 0.000 | 0.000                  |
| NC-FC             | 112.600        | 15.496     | 7.266               | 0.000 | 0.000                  |
| NC-Uncoated       | 172.342        | 15.496     | 11.121              | 0.000 | 0.000                  |
| MCC-MC            | 36.900         | 15.496     | 2.381               | 0.017 | 0.173                  |
| MCC-FC            | 65.417         | 15.496     | 4.221               | 0.000 | 0.000                  |
| MCC-Uncoated      | 125.158        | 15.496     | 8.077               | 0.000 | 0.000                  |
| MC-FC             | 28.517         | 15.496     | 1.840               | 0.066 | 0.657                  |
| MC-Uncoated       | 88.258         | 15.496     | 5.695               | 0.000 | 0.000                  |
| FC-Uncoated       | 59.742         | 15.496     | 3.855               | 0.000 | 0.001                  |

Each row tests the null hypothesis that the Sample 1 and Sample 2 distributions are the same.

Asymptotic significances (2-sided tests) are displayed. The significance level is ,050.

a. Significance values have been adjusted by the Bonferroni correction for multiple tests.

#### Pairwise Comparisons of Treatment - Odor

| Sample 1-Sample 2 | Test Statistic | Std. Error | Std. Test Statistic | Sig.  | Adj. Sig. <sup>a</sup> |
|-------------------|----------------|------------|---------------------|-------|------------------------|
| NC-MCC            | 63.008         | 15.633     | 4.031               | 0.000 | 0.001                  |
| NC-MC             | 109.317        | 15.633     | 6.993               | 0.000 | 0.000                  |
| NC-FC             | 146.392        | 15.633     | 9.365               | 0.000 | 0.000                  |
| NC-Uncoated       | 168.325        | 15.633     | 10.768              | 0.000 | 0.000                  |
| MCC-MC            | 46.308         | 15.633     | 2.962               | 0.003 | 0.031                  |
| MCC-FC            | 83.383         | 15.633     | 5.334               | 0.000 | 0.000                  |
| MCC-Uncoated      | 105.317        | 15.633     | 6.737               | 0.000 | 0.000                  |
| MC-FC             | 37.075         | 15.633     | 2.372               | 0.018 | 0.177                  |
| MC-Uncoated       | 59.008         | 15.633     | 3.775               | 0.000 | 0.002                  |
| FC-Uncoated       | 21.933         | 15.633     | 1.403               | 0.161 | 1.000                  |

Each row tests the null hypothesis that the Sample 1 and Sample 2 distributions are the same.

Asymptotic significances (2-sided tests) are displayed. The significance level is ,050.

a. Significance values have been adjusted by the Bonferroni correction for multiple tests.

#### Appearance – Day 0

#### Pairwise Comparisons of Treatment\_day

| Sample 1-Sample 2 | Test Statistic | Std. Error | Std. Test Statistic | Sig.  | Adj. Sig. <sup>a</sup> |
|-------------------|----------------|------------|---------------------|-------|------------------------|
| MC-NC             | -2.500         | 6.617      | -0.378              | 0.706 | 1.000                  |
| MC-MCC            | -10.000        | 6.617      | -1.511              | 0.131 | 1.000                  |
| MC-FC             | 15.000         | 6.617      | 2.267               | 0.023 | 0.234                  |

|                  |        |       |       |       |       |
|------------------|--------|-------|-------|-------|-------|
| MC-<br>Uncoated  | 17.500 | 6.617 | 2.645 | 0.008 | 0.082 |
| NC-MCC           | 7.500  | 6.617 | 1.133 | 0.257 | 1.000 |
| NC-FC            | 12.500 | 6.617 | 1.889 | 0.059 | 0.589 |
| NC-<br>Uncoated  | 15.000 | 6.617 | 2.267 | 0.023 | 0.234 |
| MCC-FC           | 5.000  | 6.617 | 0.756 | 0.450 | 1.000 |
| MCC-<br>Uncoated | 7.500  | 6.617 | 1.133 | 0.257 | 1.000 |
| FC-<br>Uncoated  | 2.500  | 6.617 | 0.378 | 0.706 | 1.000 |

Each row tests the null hypothesis that the Sample 1 and Sample 2 distributions are the same.

Asymptotic significances (2-sided tests) are displayed. The significance level is ,050.

a. Significance values have been adjusted by the Bonferroni correction for multiple tests.

Appearance Day 3

### Pairwise Comparisons of Treatment\_day

| Sample 1-Sample 2 | Test<br>Statistic | Std.<br>Error | Std.<br>Test<br>Statistic | Sig.  | Adj.<br>Sig. <sup>a</sup> |
|-------------------|-------------------|---------------|---------------------------|-------|---------------------------|
| Uncoated-FC       | -4.600            | 7.465         | -0.616                    | 0.538 | 1.000                     |
| Uncoated-MC       | -13.067           | 7.465         | -1.750                    | 0.080 | 0.801                     |
| Uncoated-NC       | -22.933           | 7.465         | -3.072                    | 0.002 | 0.021                     |
| Uncoated-MCC      | -28.733           | 7.465         | -3.849                    | 0.000 | 0.001                     |

|        |         |       |        |       |       |
|--------|---------|-------|--------|-------|-------|
| FC-MC  | -8.467  | 7.465 | -1.134 | 0.257 | 1.000 |
| FC-NC  | -18.333 | 7.465 | -2.456 | 0.014 | 0.141 |
| FC-MCC | -24.133 | 7.465 | -3.233 | 0.001 | 0.012 |
| MC-NC  | -9.867  | 7.465 | -1.322 | 0.186 | 1.000 |
| MC-MCC | -15.667 | 7.465 | -2.099 | 0.036 | 0.359 |
| NC-MCC | 5.800   | 7.465 | 0.777  | 0.437 | 1.000 |

Each row tests the null hypothesis that the Sample 1 and Sample 2 distributions are the same.

Asymptotic significances (2-sided tests) are displayed. The significance level is ,050.

a. Significance values have been adjusted by the Bonferroni correction for multiple tests.

Appearance Day 6

### Pairwise Comparisons of Treatment\_day

| Sample 1-<br>Sample 2 | Test<br>Statistic | Std.<br>Error | Std.<br>Test<br>Statistic | Sig.  | Adj.<br>Sig. <sup>a</sup> |
|-----------------------|-------------------|---------------|---------------------------|-------|---------------------------|
| Uncoated-<br>FC       | -7.333            | 7.770         | -0.944                    | 0.345 | 1.000                     |
| Uncoated-<br>MC       | -22.567           | 7.770         | -2.904                    | 0.004 | 0.037                     |
| Uncoated-<br>NC       | -38.033           | 7.770         | -4.895                    | 0.000 | 0.000                     |
| Uncoated-<br>MCC      | -42.567           | 7.770         | -5.479                    | 0.000 | 0.000                     |
| FC-MC                 | -15.233           | 7.770         | -1.961                    | 0.050 | 0.499                     |
| FC-NC                 | -30.700           | 7.770         | -3.951                    | 0.000 | 0.001                     |
| FC-MCC                | -35.233           | 7.770         | -4.535                    | 0.000 | 0.000                     |
| MC-NC                 | -15.467           | 7.770         | -1.991                    | 0.047 | 0.465                     |

|        |         |       |        |       |       |
|--------|---------|-------|--------|-------|-------|
| MC-MCC | -20.000 | 7.770 | -2.574 | 0.010 | 0.100 |
| NC-MCC | 4.533   | 7.770 | 0.583  | 0.560 | 1.000 |

Each row tests the null hypothesis that the Sample 1 and Sample 2 distributions are the same.

Asymptotic significances (2-sided tests) are displayed. The significance level is ,050.

a. Significance values have been adjusted by the Bonferroni correction for multiple tests.

Appearance Day 9

### Pairwise Comparisons of Treatment\_day

| Sample 1-<br>Sample 2 | Test<br>Statistic | Std.<br>Error | Std.<br>Test<br>Statistic | Sig.  | Adj.<br>Sig. <sup>a</sup> |
|-----------------------|-------------------|---------------|---------------------------|-------|---------------------------|
| Uncoated-<br>FC       | -4.200            | 7.661         | -0.548                    | 0.584 | 1.000                     |
| Uncoated-<br>MC       | -30.467           | 7.661         | -3.977                    | 0.000 | 0.001                     |
| Uncoated-<br>NC       | -39.100           | 7.661         | -5.104                    | 0.000 | 0.000                     |
| Uncoated-<br>MCC      | -49.233           | 7.661         | -6.427                    | 0.000 | 0.000                     |
| FC-MC                 | -26.267           | 7.661         | -3.429                    | 0.001 | 0.006                     |
| FC-NC                 | -34.900           | 7.661         | -4.556                    | 0.000 | 0.000                     |
| FC-MCC                | -45.033           | 7.661         | -5.879                    | 0.000 | 0.000                     |
| MC-NC                 | -8.633            | 7.661         | -1.127                    | 0.260 | 1.000                     |
| MC-MCC                | -18.767           | 7.661         | -2.450                    | 0.014 | 0.143                     |
| NC-MCC                | 10.133            | 7.661         | 1.323                     | 0.186 | 1.000                     |

Each row tests the null hypothesis that the Sample 1 and Sample 2 distributions are the same.

Asymptotic significances (2-sided tests) are displayed. The significance level is ,050.

a. Significance values have been adjusted by the Bonferroni correction for multiple tests.

Odor Day 0

### Pairwise Comparisons of Treatment\_day

| Sample 1-Sample 2 | Test<br>Statistic | Std.<br>Error | Std.<br>Test<br>Statistic | Sig.  | Adj.<br>Sig. <sup>a</sup> |
|-------------------|-------------------|---------------|---------------------------|-------|---------------------------|
| FC-MC             | -4.967            | 7.376         | -0.673                    | 0.501 | 1.000                     |
| FC-MCC            | -7.000            | 7.376         | -0.949                    | 0.343 | 1.000                     |
| FC-Uncoated       | 21.000            | 7.376         | 2.847                     | 0.004 | 0.044                     |
| FC-NC             | -23.033           | 7.376         | -3.123                    | 0.002 | 0.018                     |
| MC-MCC            | -2.033            | 7.376         | -0.276                    | 0.783 | 1.000                     |
| MC-Uncoated       | 16.033            | 7.376         | 2.174                     | 0.030 | 0.297                     |
| MC-NC             | -18.067           | 7.376         | -2.449                    | 0.014 | 0.143                     |
| MCC-Uncoated      | 14.000            | 7.376         | 1.898                     | 0.058 | 0.577                     |
| MCC-NC            | -16.033           | 7.376         | -2.174                    | 0.030 | 0.297                     |
| Uncoated-NC       | -2.033            | 7.376         | -0.276                    | 0.783 | 1.000                     |

Each row tests the null hypothesis that the Sample 1 and Sample 2 distributions are the same.

Asymptotic significances (2-sided tests) are displayed. The significance level is ,050.

a. Significance values have been adjusted by the Bonferroni correction for multiple tests.

Day\_3\_Odor across Treatment\_day

### Pairwise Comparisons of Treatment\_day

| Sample 1-<br>Sample 2 | Test<br>Statistic | Std. Error | Std. Test<br>Statistic | Sig.  | Adj. Sig. <sup>a</sup> |
|-----------------------|-------------------|------------|------------------------|-------|------------------------|
| FC-MC                 | -20.700           | 7.628      | -2.714                 | 0.007 | 0.067                  |
| FC-Uncoated           | 34.100            | 7.628      | 4.470                  | 0.000 | 0.000                  |
| FC-MCC                | -35.633           | 7.628      | -4.671                 | 0.000 | 0.000                  |
| FC-NC                 | -45.567           | 7.628      | -5.973                 | 0.000 | 0.000                  |
| MC-Uncoated           | 13.400            | 7.628      | 1.757                  | 0.079 | 0.790                  |
| MC-MCC                | -14.933           | 7.628      | -1.958                 | 0.050 | 0.503                  |
| MC-NC                 | -24.867           | 7.628      | -3.260                 | 0.001 | 0.011                  |
| Uncoated-<br>MCC      | -1.533            | 7.628      | -0.201                 | 0.841 | 1.000                  |
| Uncoated-NC           | -11.467           | 7.628      | -1.503                 | 0.133 | 1.000                  |
| MCC-NC                | -9.933            | 7.628      | -1.302                 | 0.193 | 1.000                  |

Each row tests the null hypothesis that the Sample 1 and Sample 2 distributions are the same.

Asymptotic significances (2-sided tests) are displayed. The significance level is ,050.

a. Significance values have been adjusted by the Bonferroni correction for multiple tests.

## Day\_6\_Odor across Treatment\_day

### Pairwise Comparisons of Treatment\_day

| Sample 1-<br>Sample 2 | Test<br>Statistic | Std. Error | Std. Test<br>Statistic | Sig.  | Adj. Sig. <sup>a</sup> |
|-----------------------|-------------------|------------|------------------------|-------|------------------------|
| Uncoated-FC           | -1.533            | 7.613      | -0.201                 | 0.840 | 1.000                  |
| Uncoated-MC           | -24.700           | 7.613      | -3.244                 | 0.001 | 0.012                  |



|              |         |       |        |       |       |
|--------------|---------|-------|--------|-------|-------|
| Uncoated-MCC | -30.967 | 7.613 | -4.068 | 0.000 | 0.000 |
| Uncoated-NC  | -47.133 | 7.613 | -6.191 | 0.000 | 0.000 |
| FC-MC        | -23.167 | 7.613 | -3.043 | 0.002 | 0.023 |
| FC-MCC       | -29.433 | 7.613 | -3.866 | 0.000 | 0.001 |
| FC-NC        | -45.600 | 7.613 | -5.990 | 0.000 | 0.000 |
| MC-MCC       | -6.267  | 7.613 | -0.823 | 0.410 | 1.000 |
| MC-NC        | -22.433 | 7.613 | -2.947 | 0.003 | 0.032 |
| MCC-NC       | -16.167 | 7.613 | -2.124 | 0.034 | 0.337 |

Each row tests the null hypothesis that the Sample 1 and Sample 2 distributions are the same.

Asymptotic significances (2-sided tests) are displayed. The significance level is ,050.

a. Significance values have been adjusted by the Bonferroni correction for multiple tests.

## Day\_9\_Odor across Treatment\_day

### Pairwise Comparisons of Treatment\_day

| Sample 1-<br>Sample 2 | Test<br>Statistic | Std. Error | Std. Test<br>Statistic | Sig.  | Adj. Sig. <sup>a</sup> |
|-----------------------|-------------------|------------|------------------------|-------|------------------------|
| Uncoated-FC           | -1.333            | 7.773      | -0.172                 | 0.864 | 1.000                  |
| Uncoated-MC           | -15.033           | 7.773      | -1.934                 | 0.053 | 0.531                  |
| Uncoated-MCC          | -28.600           | 7.773      | -3.680                 | 0.000 | 0.002                  |
| Uncoated-NC           | -46.700           | 7.773      | -6.008                 | 0.000 | 0.000                  |
| FC-MC                 | -13.700           | 7.773      | -1.763                 | 0.078 | 0.780                  |
| FC-MCC                | -27.267           | 7.773      | -3.508                 | 0.000 | 0.005                  |

|        |         |       |        |       |       |
|--------|---------|-------|--------|-------|-------|
| FC-NC  | -45.367 | 7.773 | -5.837 | 0.000 | 0.000 |
| MC-MCC | -13.567 | 7.773 | -1.745 | 0.081 | 0.809 |
| MC-NC  | -31.667 | 7.773 | -4.074 | 0.000 | 0.000 |
| MCC-NC | -18.100 | 7.773 | -2.329 | 0.020 | 0.199 |

Each row tests the null hypothesis that the Sample 1 and Sample 2 distributions are the same.

Asymptotic significances (2-sided tests) are displayed. The significance level is ,050.

a. Significance values have been adjusted by the Bonferroni correction for multiple tests.

## Day\_0\_Texture across Treatment\_day

### Pairwise Comparisons of Treatment\_day

| Sample 1-Sample 2 | Test<br>Statistic | Std.<br>Error | Std.<br>Test<br>Statistic | Sig.  | Adj.<br>Sig. <sup>a</sup> |
|-------------------|-------------------|---------------|---------------------------|-------|---------------------------|
| FC-MC             | -2.500            | 6.357         | -0.393                    | 0.694 | 1.000                     |
| FC-Uncoated       | 5.000             | 6.357         | 0.787                     | 0.432 | 1.000                     |
| FC-MCC            | -5.000            | 6.357         | -0.787                    | 0.432 | 1.000                     |
| FC-NC             | -5.000            | 6.357         | -0.787                    | 0.432 | 1.000                     |
| MC-Uncoated       | 2.500             | 6.357         | 0.393                     | 0.694 | 1.000                     |
| MC-MCC            | -2.500            | 6.357         | -0.393                    | 0.694 | 1.000                     |
| MC-NC             | -2.500            | 6.357         | -0.393                    | 0.694 | 1.000                     |
| Uncoated-MCC      | 0.000             | 6.357         | 0.000                     | 1.000 | 1.000                     |
| Uncoated-NC       | 0.000             | 6.357         | 0.000                     | 1.000 | 1.000                     |
| MCC-NC            | 0.000             | 6.357         | 0.000                     | 1.000 | 1.000                     |

Each row tests the null hypothesis that the Sample 1 and Sample 2 distributions are the same.

Asymptotic significances (2-sided tests) are displayed. The significance level is ,050.

a. Significance values have been adjusted by the Bonferroni correction for multiple tests.

### Day\_3\_Texture across Treatment\_day

#### Pairwise Comparisons of Treatment\_day

| Sample 1-<br>Sample 2 | Test<br>Statistic | Std. Error | Std. Test<br>Statistic | Sig.  | Adj. Sig. <sup>a</sup> |
|-----------------------|-------------------|------------|------------------------|-------|------------------------|
| FC-Uncoated           | 4.333             | 7.187      | 0.603                  | 0.547 | 1.000                  |
| FC-MC                 | -7.600            | 7.187      | -1.058                 | 0.290 | 1.000                  |
| FC-NC                 | -14.667           | 7.187      | -2.041                 | 0.041 | 0.413                  |
| FC-MCC                | -20.067           | 7.187      | -2.792                 | 0.005 | 0.052                  |
| Uncoated-MC           | -3.267            | 7.187      | -0.455                 | 0.649 | 1.000                  |
| Uncoated-NC           | -10.333           | 7.187      | -1.438                 | 0.150 | 1.000                  |
| Uncoated-MCC          | -15.733           | 7.187      | -2.189                 | 0.029 | 0.286                  |
| MC-NC                 | -7.067            | 7.187      | -0.983                 | 0.325 | 1.000                  |
| MC-MCC                | -12.467           | 7.187      | -1.735                 | 0.083 | 0.828                  |
| NC-MCC                | 5.400             | 7.187      | 0.751                  | 0.452 | 1.000                  |

Each row tests the null hypothesis that the Sample 1 and Sample 2 distributions are the same.

Asymptotic significances (2-sided tests) are displayed. The significance level is ,050.

a. Significance values have been adjusted by the Bonferroni correction for multiple tests.

### Day\_6\_Texture across Treatment\_day

#### Pairwise Comparisons of Treatment\_day

| Sample 1-<br>Sample 2 | Test<br>Statistic | Std. Error | Std. Test<br>Statistic | Sig.  | Adj. Sig. <sup>a</sup> |
|-----------------------|-------------------|------------|------------------------|-------|------------------------|
| FC-Uncoated           | 13.267            | 7.706      | 1.722                  | 0.085 | 0.851                  |
| FC-NC                 | -26.067           | 7.706      | -3.383                 | 0.001 | 0.007                  |
| FC-MC                 | -31.367           | 7.706      | -4.071                 | 0.000 | 0.000                  |
| FC-MCC                | -46.967           | 7.706      | -6.095                 | 0.000 | 0.000                  |
| Uncoated-NC           | -12.800           | 7.706      | -1.661                 | 0.097 | 0.967                  |
| Uncoated-MC           | -18.100           | 7.706      | -2.349                 | 0.019 | 0.188                  |
| Uncoated-<br>MCC      | -33.700           | 7.706      | -4.373                 | 0.000 | 0.000                  |
| NC-MC                 | 5.300             | 7.706      | 0.688                  | 0.492 | 1.000                  |
| NC-MCC                | 20.900            | 7.706      | 2.712                  | 0.007 | 0.067                  |
| MC-MCC                | -15.600           | 7.706      | -2.024                 | 0.043 | 0.429                  |

Each row tests the null hypothesis that the Sample 1 and Sample 2 distributions are the same.

Asymptotic significances (2-sided tests) are displayed. The significance level is ,050.

a. Significance values have been adjusted by the Bonferroni correction for multiple tests.

## Day\_9\_Texture across Treatment\_day

### Pairwise Comparisons of Treatment\_day

| Sample 1-<br>Sample 2 | Test<br>Statistic | Std. Error | Std. Test<br>Statistic | Sig.  | Adj. Sig. <sup>a</sup> |
|-----------------------|-------------------|------------|------------------------|-------|------------------------|
| MC-Uncoated           | 22.867            | 7.422      | 3.081                  | 0.002 | 0.021                  |
| MC-NC                 | -25.333           | 7.422      | -3.413                 | 0.001 | 0.006                  |
| MC-FC                 | 30.100            | 7.422      | 4.056                  | 0.000 | 0.000                  |

|              |         |       |        |       |       |
|--------------|---------|-------|--------|-------|-------|
| MC-MCC       | -41.033 | 7.422 | -5.529 | 0.000 | 0.000 |
| Uncoated-NC  | -2.467  | 7.422 | -0.332 | 0.740 | 1.000 |
| Uncoated-FC  | -7.233  | 7.422 | -0.975 | 0.330 | 1.000 |
| Uncoated-MCC | -18.167 | 7.422 | -2.448 | 0.014 | 0.144 |
| NC-FC        | 4.767   | 7.422 | 0.642  | 0.521 | 1.000 |
| NC-MCC       | 15.700  | 7.422 | 2.115  | 0.034 | 0.344 |
| FC-MCC       | -10.933 | 7.422 | -1.473 | 0.141 | 1.000 |

Each row tests the null hypothesis that the Sample 1 and Sample 2 distributions are the same.

Asymptotic significances (2-sided tests) are displayed. The significance level is ,050.

a. Significance values have been adjusted by the Bonferroni correction for multiple tests.

## Day\_0\_Colour across Treatment\_day

### Pairwise Comparisons of Treatment\_day

| Sample 1-Sample 2 | Test<br>Statistic | Std.<br>Error | Std.<br>Test<br>Statistic | Sig.  | Adj.<br>Sig. <sup>a</sup> |
|-------------------|-------------------|---------------|---------------------------|-------|---------------------------|
| MC-NC             | -2.400            | 6.967         | -0.344                    | 0.730 | 1.000                     |
| MC-Uncoated       | 7.267             | 6.967         | 1.043                     | 0.297 | 1.000                     |
| MC-FC             | 9.700             | 6.967         | 1.392                     | 0.164 | 1.000                     |
| MC-MCC            | -12.133           | 6.967         | -1.742                    | 0.082 | 0.816                     |
| NC-Uncoated       | 4.867             | 6.967         | 0.699                     | 0.485 | 1.000                     |
| NC-FC             | 7.300             | 6.967         | 1.048                     | 0.295 | 1.000                     |
| NC-MCC            | 9.733             | 6.967         | 1.397                     | 0.162 | 1.000                     |

|              |        |       |        |       |       |
|--------------|--------|-------|--------|-------|-------|
| Uncoated-FC  | -2.433 | 6.967 | -0.349 | 0.727 | 1.000 |
| Uncoated-MCC | -4.867 | 6.967 | -0.699 | 0.485 | 1.000 |
| FC-MCC       | -2.433 | 6.967 | -0.349 | 0.727 | 1.000 |

Each row tests the null hypothesis that the Sample 1 and Sample 2 distributions are the same.

Asymptotic significances (2-sided tests) are displayed. The significance level is ,050.

a. Significance values have been adjusted by the Bonferroni correction for multiple tests.

### Pairwise Comparisons of Treatment\_day

| Sample 1-<br>Sample 2 | Test<br>Statistic | Std. Error | Std. Test<br>Statistic | Sig.  | Adj. Sig. <sup>a</sup> |
|-----------------------|-------------------|------------|------------------------|-------|------------------------|
| Uncoated-FC           | -3.200            | 7.511      | -0.426                 | 0.670 | 1.000                  |
| Uncoated-MC           | -11.600           | 7.511      | -1.544                 | 0.123 | 1.000                  |
| Uncoated-NC           | -16.400           | 7.511      | -2.183                 | 0.029 | 0.290                  |
| Uncoated-MCC          | -23.300           | 7.511      | -3.102                 | 0.002 | 0.019                  |
| FC-MC                 | -8.400            | 7.511      | -1.118                 | 0.263 | 1.000                  |
| FC-NC                 | -13.200           | 7.511      | -1.757                 | 0.079 | 0.789                  |
| FC-MCC                | -20.100           | 7.511      | -2.676                 | 0.007 | 0.075                  |
| MC-NC                 | -4.800            | 7.511      | -0.639                 | 0.523 | 1.000                  |
| MC-MCC                | -11.700           | 7.511      | -1.558                 | 0.119 | 1.000                  |
| NC-MCC                | 6.900             | 7.511      | 0.919                  | 0.358 | 1.000                  |

Each row tests the null hypothesis that the Sample 1 and Sample 2 distributions are the same.

Asymptotic significances (2-sided tests) are displayed. The significance level is ,050.

a. Significance values have been adjusted by the Bonferroni correction for multiple tests.

## Day\_6\_Colour across Treatment\_day

### Pairwise Comparisons of Treatment\_day

| Sample 1-<br>Sample 2 | Test<br>Statistic | Std. Error | Std. Test<br>Statistic | Sig.  | Adj. Sig. <sup>a</sup> |
|-----------------------|-------------------|------------|------------------------|-------|------------------------|
| FC-Uncoated           | 3.500             | 7.631      | 0.459                  | 0.646 | 1.000                  |
| FC-MC                 | -14.000           | 7.631      | -1.835                 | 0.067 | 0.666                  |
| FC-NC                 | -21.133           | 7.631      | -2.769                 | 0.006 | 0.056                  |
| FC-MCC                | -23.367           | 7.631      | -3.062                 | 0.002 | 0.022                  |
| Uncoated-MC           | -10.500           | 7.631      | -1.376                 | 0.169 | 1.000                  |
| Uncoated-NC           | -17.633           | 7.631      | -2.311                 | 0.021 | 0.208                  |
| Uncoated-MCC          | -19.867           | 7.631      | -2.603                 | 0.009 | 0.092                  |
| MC-NC                 | -7.133            | 7.631      | -0.935                 | 0.350 | 1.000                  |
| MC-MCC                | -9.367            | 7.631      | -1.227                 | 0.220 | 1.000                  |
| NC-MCC                | 2.233             | 7.631      | 0.293                  | 0.770 | 1.000                  |

Each row tests the null hypothesis that the Sample 1 and Sample 2 distributions are the same.

Asymptotic significances (2-sided tests) are displayed. The significance level is ,050.

a. Significance values have been adjusted by the Bonferroni correction for multiple tests.
